# Supplementary material
Source: MDPI journal article supplement (https://www.mdpi.com/1424-2818/14/10/800)
Supplement: s1 [file s1]

SUPPLEMENTARY MATERIAL

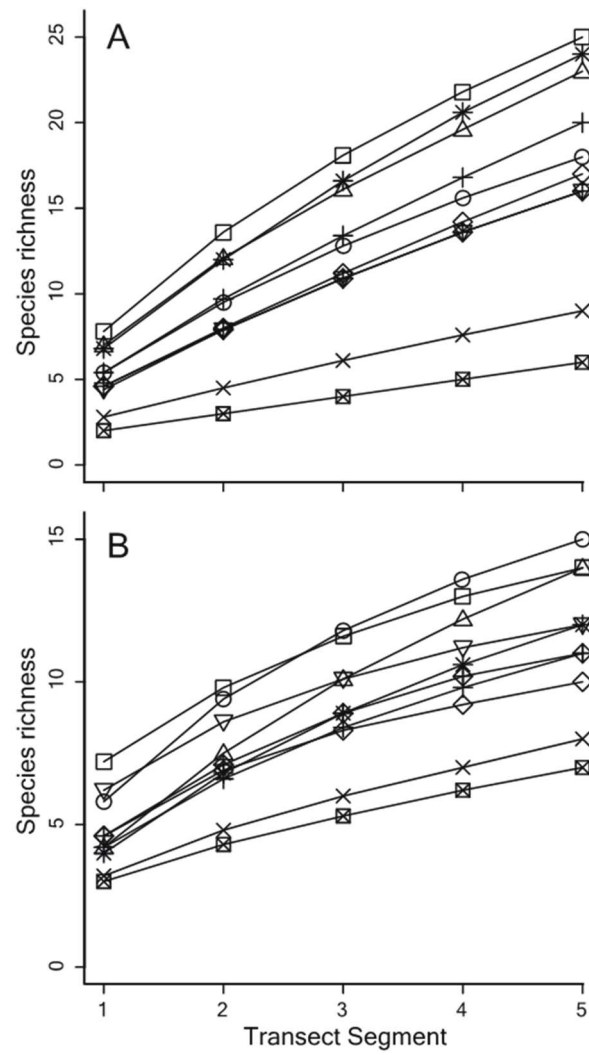

**Figure S1.** A) Species accumulation curve for overstory stratum. B) Species accumulation curve for understory stratum. Each curve shows the accumulation of species along five segments (every 10 m) of the transect.
