# Supplementary material
Source: MDPI journal article supplement (https://www.mdpi.com/1424-2818/14/10/800)
Supplement: s1 [file s1]

Archive with 2 entries (2 files):
- diversity-1917560-supplementary.pdf
- TableS1.xlsx
