# Supplementary material
Source: MDPI journal article supplement (https://www.mdpi.com/1424-2818/14/10/800)
Supplement: s1 [file s1 › TableS1.xlsx]

## Sheet: TransectDataTree
Transect,PlantNumber,BD,DBH,Circumference,Position,LifeForm,Species,Notes
1,1,NA,4.1,NA,0,Palm,Astrocaryum_mexicanum,
1,2,NA,1,NA,2.2,Tree,Piper_aequale,
1,3,6.7,NA,NA,3,Liana,Salacia_megistophylla,Liana
1,4,NA,1.3,NA,3.2,Tree,Psychotria_faxlucens,
1,4,NA,1.3,NA,3.2,Tree,Psychotria_faxlucens,
1,5,NA,2.8,NA,4.2,Tree,Psychotria_faxlucens,
1,6,NA,6.3,NA,4.4,Palm,Astrocaryum_mexicanum,
1,7,NA,1.1,NA,5.3,Palm,Chamaedorea_pinnatifrons,
1,8,NA,6.1,NA,5.6,Tree,Croton_schiedianus,
1,9,NA,8.44,26.5,4.9,Tree,Pouteria_rhynchocarpa,
1,10,NA,1.6,NA,4.3,Palm,Chamaedorea_pinnatifrons,
1,11,NA,2.1,NA,6.4,Palm,Chamaedorea_alternans,
1,12,NA,1.8,NA,9,Palm,Chamaedorea_alternans,
1,13,NA,2,NA,9,Palm,Chamaedorea_alternans,
1,14,NA,3.5,NA,10.9,Tree,Hampea_nutricia,
1,15,NA,5.7,NA,11.2,Tree,Jacaratia_dolichaula,
1,16,NA,77,NA,13.2,Tree,Nectandra_ambigens,
1,17,NA,3.2,NA,14.5,Tree,Poulsenia_armata,
1,18,NA,2.7,NA,14.9,Palm,Chamaedorea_alternans,
1,19,NA,1.1,NA,15.6,Tree,Rinorea_guatemalensis,
1,20,NA,2,NA,17.6,Palm,Chamaedorea_alternans,
1,21,NA,1,NA,18.4,Tree,Quararibea_yunckeri,
1,22,NA,1.7,NA,18.7,Tree,Piper_aequale,
1,22,NA,1.5,NA,18.7,Tree,Piper_aequale,
1,22,NA,2.8,NA,18.7,Tree,Piper_aequale,
1,22,NA,2.1,NA,18.7,Tree,Piper_aequale,
1,23,NA,1.1,NA,19.6,Tree,Pseudolmedia_glabrata,
1,24,NA,15.44,48.5,19.4,Tree,Psychotria_faxlucens,
1,25,NA,1.3,NA,21.7,Tree,Daphnopsis_microcarpa,
1,26,NA,22.6,71,21.8,Tree,Croton_schiedianus,
1,27,NA,5.7,NA,22.6,Tree,Daphnopsis_microcarpa,
1,28,NA,1.8,NA,24.4,Tree,Guarea_glabra,
1,29,NA,2.1,NA,26.1,Palm,Chamaedorea_alternans,
1,30,NA,17.99,56.5,27.2,Tree,Clarisia_biflora,
1,31,NA,13.21,41.5,29.2,Tree,Rinorea_hummelii,
1,32,NA,2.2,NA,31.6,Tree,Psychotria_faxlucens,
1,33,NA,2.9,NA,31.6,Tree,Poulsenia_armata,
1,33,NA,1.4,NA,31.6,Tree,Poulsenia_armata,
1,34,NA,11.46,36,33.4,Tree,Jacaratia_dolichaula,
1,35,NA,16.71,52.5,35.2,Tree,Jacaratia_dolichaula,
1,36,NA,1.7,NA,37.6,Tree,Piper_aequale,
1,36,NA,1.4,NA,37.6,Tree,Piper_aequale,
1,36,NA,1.6,NA,37.6,Tree,Piper_aequale,
1,36,NA,1.4,NA,37.6,Tree,Piper_aequale,
1,36,NA,1.2,NA,37.6,Tree,Piper_aequale,
1,36,NA,1.1,NA,37.6,Tree,Piper_aequale,
1,36,NA,1.4,NA,37.6,Tree,Piper_aequale,
1,36,NA,1.4,NA,37.6,Tree,Piper_aequale,
1,36,NA,1.1,NA,37.6,Tree,Piper_aequale,
1,36,NA,1,NA,37.6,Tree,Piper_aequale,
1,36,NA,1.3,NA,37.6,Tree,Piper_aequale,
1,37,NA,4.8,NA,38.6,Tree,Rinorea_guatemalensis,
1,37,NA,2.6,NA,38.6,Tree,Rinorea_guatemalensis,
1,38,3.1,NA,NA,40.2,Liana,Smilax_aristolochiifolia,liana
1,38,3.2,NA,NA,40.2,Liana,Smilax_aristolochiifolia,liana
1,38,3.6,NA,NA,40.2,Liana,Smilax_aristolochiifolia,liana
1,38,2.9,NA,NA,40.2,Liana,Smilax_aristolochiifolia,liana
1,38,3.3,NA,NA,40.2,Liana,Smilax_aristolochiifolia,liana
1,38,1.7,NA,NA,40.2,Liana,Smilax_aristolochiifolia,liana
1,39,NA,13.53,42.5,40.4,Tree,Psychotria_chiapensis,
1,40,NA,1.3,NA,40.4,Palm,Chamaedorea_oblongata,
1,41,NA,4.7,NA,39.7,Tree,Omphalea_oleifera,
1,42,NA,4.5,NA,40.2,Palm,Astrocaryum_mexicanum,
1,43,NA,70.5,NA,40.7,Tree,Poulsenia_armata,
1,44,NA,17.03,53.5,41.5,Tree,Cecropia_obtusifolia,
1,45,NA,1,NA,41.9,Tree,Piper_aequale,
1,45,NA,1.1,NA,41.9,Tree,Piper_aequale,
1,45,NA,1,NA,41.9,Tree,Piper_aequale,
1,46,1.7,NA,NA,42.4,Liana,Smilax_aristolochiifolia,liana
1,47,NA,1.3,NA,43.7,Tree,Trichilia_martiana,
1,48,NA,1.4,NA,44.9,Tree,Poulsenia_armata,
1,49,NA,1.7,NA,45.9,Palm,Chamaedorea_oblongata,
1,50,NA,5.4,NA,48.2,Palm,Astrocaryum_mexicanum,
1,51,NA,4.5,NA,50,Palm,Astrocaryum_mexicanum,
1,52,NA,1.3,NA,50,Palm,Chamaedorea_pinnatifrons,
2,1,NA,12.26,38.5,0,Tree,Nectandra_ambigens,
2,2,NA,6.3,NA,1.2,Palm,Astrocaryum_mexicanum,
2,3,NA,6.6,NA,2.3,Palm,Astrocaryum_mexicanum,
2,4,NA,5.2,NA,3.4,Tree,Trophis_mexicanum,
2,5,NA,8.44,26.5,4.5,Tree,Faramea_occidentalis,
2,6,NA,1.7,NA,4.7,Palm,Chamaedorea_ernesti_augusti,
2,7,NA,25.31,79.5,5.6,Tree,Pleuranthodendron_lindenii,
2,8,NA,10.35,32.5,6.4,Tree,Aegiphila_costaricensis,
2,9,NA,4.7,NA,8.2,Palm,Astrocaryum_mexicanum,
2,10,NA,1.6,NA,10,Tree,Diospyros_digyna,
2,11,NA,5.6,NA,10.1,Palm,Astrocaryum_mexicanum,
2,12,NA,2.3,NA,14.1,Palm,Bactris_mexicana,
2,12,NA,1.7,NA,14.1,Palm,Bactris_mexicana,
2,12,NA,2.9,NA,14.1,Palm,Bactris_mexicana,
2,12,NA,1.9,NA,14.1,Palm,Bactris_mexicana,
2,12,NA,2.1,NA,14.1,Palm,Bactris_mexicana,
2,12,NA,2.3,NA,14.1,Palm,Bactris_mexicana,
2,13,NA,1,NA,14.6,Tree,Inga_paterna,
2,14,NA,23.08,72.5,15.2,Tree,Dendropanax_arboreus,
2,15,NA,1.4,NA,17,Tree,Pseudolmedia_glabrata,
2,16,NA,10.03,31.5,17.2,Tree,Psychotria_faxlucens,
2,17,NA,6.8,NA,17.1,Palm,Astrocaryum_mexicanum,
2,18,NA,1.1,NA,19,Tree,Pseudolmedia_glabrata,
2,19,NA,10.03,31.5,20.6,Tree,Poulsenia_armata,
2,20,NA,1,NA,21.1,Tree,Connarus_schultesii,
2,21,NA,1.3,NA,21.9,Tree,Pouteria_durlandii,
2,22,NA,3.9,NA,22.6,Palm,Astrocaryum_mexicanum,
2,23,NA,5.8,NA,23.7,Palm,Astrocaryum_mexicanum,
2,24,NA,1.5,NA,24.2,Tree,Pseudolmedia_glabrata,
2,25,NA,5.1,NA,25.2,Palm,Astrocaryum_mexicanum,
2,26,NA,4.4,NA,31.7,Palm,Astrocaryum_mexicanum,
2,27,NA,6.5,NA,34.5,Tree,Psychotria_chiapensis,
2,28,NA,11.3,35.5,36,Tree,Pleuranthodendron_lindenii,
2,29,NA,1.3,NA,35.9,Tree,Piper_aequale,
2,30,NA,3.1,NA,36.5,Tree,Psychotria_faxlucens,
2,31,NA,19.26,60.5,38.2,Tree,Poulsenia_armata,
2,32,NA,14.17,44.5,38.9,Tree,Psychotria_simiarum,
2,33,NA,6.5,NA,39,Tree,Psychotria_faxlucens,
2,34,NA,17.35,54.5,41.6,Tree,Pleuranthodendron_lindenii,
2,35,NA,1,NA,41.7,Tree,Poulsenia_armata,
2,36,NA,2.6,NA,42.6,Tree,Pseudolmedia_glabrata,
2,37,NA,2.8,NA,42.6,Tree,Pterocarpus_rohrii,
2,38,NA,11.3,35.5,44.1,Tree,Pleuranthodendron_lindenii,
2,39,NA,5.9,NA,48.4,Tree,Psychotria_faxlucens,
2,40,NA,7.2,NA,47,Tree,Psychotria_faxlucens,
2,41,NA,2.8,NA,49.2,Tree,Parathesis_conzattii,
2,42,2.7,NA,NA,48.4,Liana,Machaerium_floribundum,Liana
2,43,NA,11.94,37.5,49.1,Tree,Trichilia_martiana,
2,44,NA,1.8,NA,49.9,Tree,Piper_aequale,
2,45,NA,2.5,NA,49.9,Tree,Psychotria_faxlucens,
3,1,NA,5.3,NA,0,Palm,Astrocaryum_mexicanum,
3,2,NA,9,NA,1.9,Tree,Tridimeris_tuxtlensis,
3,3,6.2,NA,NA,2.9,Liana,Salacia_megistophylla,Liana
3,4,NA,1.5,NA,5.3,Tree,Orpheum_violaceus,
3,5,NA,2.3,NA,7.8,Tree,Psychotria_chiapensis,
3,6,NA,2.4,NA,7.8,Tree,Pouteria_durlandii,
3,7,NA,2.3,NA,10.3,Palm,Bactris_mexicana,
3,7,NA,1.9,NA,10.3,Palm,Bactris_mexicana,
3,8,NA,4.9,NA,11.1,Palm,Astrocaryum_mexicanum,
3,9,NA,1.6,NA,12.9,Tree,Piper_aequale,
3,9,NA,1,NA,12.9,Tree,Piper_aequale,
3,10,NA,4.8,NA,13.2,Palm,Astrocaryum_mexicanum,
3,11,NA,16.23,51,14.5,Tree,Faramea_occidentalis,
3,12,NA,1.2,NA,14.3,Tree,Capparis_frondosa,
3,13,NA,1.3,NA,14.5,Tree,Perrotetia_sp,
3,14,NA,1.1,NA,14.7,Tree,Psychotria_faxlucens,Pos not recorded
3,15,2.9,NA,NA,14.7,Liana,Smilax_domingensii,"Pos not recorded, Liana"
3,16,NA,1.9,NA,14.9,Tree,Perrotetia_sp,
3,17,NA,1.6,NA,16.2,Tree,Perrotetia_sp,
3,18,NA,4.7,NA,18.5,Palm,Astrocaryum_mexicanum,
3,19,NA,3.8,NA,19.9,Palm,Astrocaryum_mexicanum,
3,20,NA,19.1,60,22,Tree,Garcinia_intermedia,
3,21,NA,5,NA,24.5,Palm,Astrocaryum_mexicanum,
3,22,NA,2.3,NA,24.6,Palm,Bactris_mexicana,
3,23,NA,4.5,NA,26.2,Palm,Astrocaryum_mexicanum,
3,24,NA,15.92,50,27.6,Tree,Faramea_occidentalis,
3,25,NA,4.3,NA,29,Tree,Psychotria_chiapensis,
3,26,NA,4.2,NA,30.5,Palm,Astrocaryum_mexicanum,
3,27,NA,11.46,36,31.5,Tree,Pouteria_rhynchocarpa,
3,28,NA,2.4,NA,32.8,Tree,Ocotea_dendrodaphne,
3,29,NA,5.3,NA,36.1,Palm,Astrocaryum_mexicanum,
3,30,NA,44.88,141,40.7,Tree,Neea_psychotroides,
3,31,NA,4.8,NA,41.6,Tree,Ardisia_compressa,
3,32,NA,2.9,NA,44.3,Palm,Chamaedorea_alternans,
3,33,NA,1.8,NA,45.3,Palm,Chamaedorea_alternans,
3,34,NA,11.94,37.5,46.2,Tree,Psychotria_chiapensis,
3,35,NA,9.39,29.5,47.6,Tree,Hampea_nutricia,
4,1,NA,2.5,NA,0,Tree,Chamedorea_tepegilote,
4,2,NA,5.2,NA,1.3,Palm,Astrocaryum_mexicanum,
4,3,NA,4.8,NA,1.9,Palm,Astrocaryum_mexicanum,
4,4,NA,19.42,61,2.5,Tree,Croton_schiedianus,
4,5,NA,5.6,NA,4.6,Palm,Astrocaryum_mexicanum,
4,6,NA,4.4,NA,8.3,Palm,Astrocaryum_mexicanum,
4,7,NA,4.6,NA,9.1,Palm,Astrocaryum_mexicanum,
4,8,NA,78,NA,16,Tree,Nectandra_ambigens,
4,9,NA,4.6,NA,12.9,Palm,Astrocaryum_mexicanum,
4,10,NA,16.23,51,19.9,Tree,Pseudolmedia_glabrata,
4,11,NA,5.8,NA,22.9,Palm,Astrocaryum_mexicanum,
4,12,NA,4.9,NA,26.4,Palm,Astrocaryum_mexicanum,
4,13,NA,4.6,NA,28.1,Palm,Astrocaryum_mexicanum,
4,14,NA,13.37,42,29,Tree,Brosimum_alicastrum,
4,15,NA,81,NA,30,Tree,Sideroxylon_venezuelensis,
4,16,NA,4.3,NA,31.5,Palm,Astrocaryum_mexicanum,
4,17,NA,4.6,NA,32.4,Palm,Astrocaryum_mexicanum,
4,18,NA,5.2,NA,34.5,Palm,Astrocaryum_mexicanum,
4,19,NA,4.7,NA,36.5,Tree,Guarea_glabra,
4,20,NA,12.26,38.5,38.3,Tree,Amphitecna_tuxtlensis,
4,21,NA,5.3,NA,38.8,Palm,Astrocaryum_mexicanum,
4,22,NA,4.3,NA,43,Palm,Astrocaryum_mexicanum,
4,23,NA,4.3,NA,43.8,Palm,Astrocaryum_mexicanum,
4,24,NA,4.8,NA,46.3,Palm,Astrocaryum_mexicanum,
4,25,NA,34.38,108,49.2,Tree,Pseudolmedia_glabrata,
5,1,NA,5.2,NA,0,Palm,Astrocaryum_mexicanum,
5,2,NA,20.21,63.5,1.5,Palm,Brosimum_alicastrum,
5,3,NA,56.66,178,2.8,Tree,Dendropanax_arboreus,
5,4,NA,1.1,NA,4.5,Tree,Acalypha_diversifolia,
5,5,NA,1,NA,3.6,Tree,Acalypha_diversifolia,
5,6,NA,1.7,NA,5.9,Tree,Trophis_mexicanum,
5,7,NA,5.5,NA,5.5,Tree,Orpheum_oblanceolatum,
5,8,NA,2.7,NA,5.4,Tree,Connarus_schultesii,
5,9,NA,2,NA,7.7,Palm,Chamaedorea_alternans,
5,10,NA,4.8,NA,6.6,Palm,Astrocaryum_mexicanum,
5,11,NA,5.3,NA,5,Palm,Astrocaryum_mexicanum,
5,12,NA,5.6,NA,5.4,Palm,Astrocaryum_mexicanum,
5,13,NA,4.5,NA,11,Palm,Astrocaryum_mexicanum,
5,14,NA,4.9,NA,13.3,Palm,Astrocaryum_mexicanum,
5,15,NA,7.3,NA,15.2,Tree,Psychotria_chiapensis,
5,16,NA,3.9,NA,15.4,Tree,Poulsenia_armata,
5,17,2.7,NA,NA,18.8,Liana,Ipomoea_phylomega,Liana
5,18,NA,4.7,NA,19.5,Palm,Astrocaryum_mexicanum,
5,19,NA,5.1,NA,21.3,Palm,Astrocaryum_mexicanum,
5,20,NA,4.4,NA,28.7,Palm,Astrocaryum_mexicanum,
5,21,NA,5.1,NA,31.3,Palm,Astrocaryum_mexicanum,
5,22,NA,93,NA,32.4,Tree,Nectandra_ambigens,
5,24,NA,4,NA,3.3,Palm,Astrocaryum_mexicanum,
5,25,NA,2.2,NA,34.5,Palm,Bactris_mexicana,
5,25,NA,2.5,NA,34.5,Palm,Bactris_mexicana,
5,25,NA,2.6,NA,34.5,Palm,Bactris_mexicana,
5,25,NA,2.9,NA,34.5,Palm,Bactris_mexicana,
5,25,NA,2.9,NA,34.5,Palm,Bactris_mexicana,
5,26,NA,2.1,NA,35.2,Palm,Chamaedorea_alternans,
5,27,NA,1.3,NA,34.6,Tree,Crossopetalum_parviflorum,
5,28,NA,5.3,NA,38.4,Palm,Astrocaryum_mexicanum,
5,29,NA,1.3,NA,36.2,Tree,Faramea_occidentalis,
5,30,NA,4.5,NA,40.5,Palm,Astrocaryum_mexicanum,
5,31,NA,4.5,NA,41,Palm,Astrocaryum_mexicanum,
5,32,NA,12.57,39.5,46.9,Tree,Guarea_glabra,
5,33,NA,24.83,78,48.5,Tree,Pouteria_durlandii,
5,33,NA,3.1,NA,48.5,Tree,Pouteria_durlandii,
5,33,NA,2.5,NA,48.5,Tree,Pouteria_durlandii,
5,34,NA,1.4,NA,49.1,Tree,Brosimum_alicastrum,
5,35,NA,5.5,NA,50,Palm,Astrocaryum_mexicanum,
6,1,NA,19.42,61,0,Tree,Vochysia_hondurensis,
6,2,NA,1.2,NA,1.7,Tree,Piper_lapatifolia,
6,2,NA,1,NA,1.7,Tree,Piper_lapatifolia,
6,3,NA,5.7,NA,3.3,Palm,Astrocaryum_mexicanum,
6,4,NA,2.2,NA,5.3,Tree,Crossopetalum_parviflorum,
6,5,NA,9.87,31,6.5,Tree,Stemmadenia_donnell_smithii,
6,6,NA,2.1,NA,9.3,Tree,Capparis_frondosa,
6,7,NA,6.5,NA,9.3,Tree,Trophis_mexicanum,
6,8,NA,1.3,NA,12.4,Tree,Acalypha_diversifolia,
6,9,NA,1,NA,12.4,Tree,Acalypha_diversifolia,
6,10,NA,3.5,NA,13.8,Tree,Guarea_glabra,
6,11,NA,5.2,NA,15.2,Palm,Astrocaryum_mexicanum,
6,12,NA,4.5,NA,17.1,Palm,Astrocaryum_mexicanum,
6,13,NA,6.5,NA,19.1,Palm,Astrocaryum_mexicanum,
6,14,NA,5.4,NA,27.2,Palm,Astrocaryum_mexicanum,
6,15,NA,6,NA,26.7,Palm,Astrocaryum_mexicanum,
6,16,NA,54.43,171,26,Tree,Sapium_plateriflorum,
6,17,NA,4.4,NA,27,Palm,Astrocaryum_mexicanum,
6,18,NA,2.3,NA,28.5,Tree,Poulsenia_armata,
6,19,NA,2.3,NA,29.2,Tree,Trophis_mexicanum,
6,20,NA,2.7,NA,28.9,Palm,Chamaedorea_alternans,
6,21,NA,2.2,NA,29.3,Tree,Trophis_mexicanum,
6,22,NA,3.4,NA,32.8,Tree,Pouteria_reticulata,
6,23,NA,5.7,NA,34.8,Palm,Astrocaryum_mexicanum,
6,24,NA,2.3,NA,35.8,Tree,Piper_amalago,
6,25,NA,2.4,NA,43.7,Tree,Pseudolmedia_glabrata,
6,25,NA,1,NA,43.7,Tree,Pseudolmedia_glabrata,
6,26,NA,1.7,NA,46.4,Tree,Pseudolmedia_glabrata,
6,27,NA,1.8,NA,47.2,Tree,Piper_amalago,
6,28,NA,2.6,NA,47.6,Tree,Poulsenia_armata,
6,28,NA,1.3,NA,47.6,Tree,Poulsenia_armata,
6,29,NA,5.8,NA,50,Tree,Erythrina_folkersii,
7,1,NA,68,NA,2.5,Tree,Nectandra_ambigens,
7,2,NA,4.9,NA,1.1,Palm,Astrocaryum_mexicanum,
7,3,NA,5.5,NA,5.9,Tree,Amphitecna_tuxtlensis,
7,4,NA,4.5,NA,5.9,Palm,Astrocaryum_mexicanum,
7,5,NA,4.4,NA,6,Palm,Astrocaryum_mexicanum,
7,6,NA,6.2,NA,7.9,Palm,Astrocaryum_mexicanum,
7,7,NA,4.7,NA,12,Palm,Astrocaryum_mexicanum,
7,8,NA,4.8,NA,19.2,Palm,Astrocaryum_mexicanum,
7,9,NA,31.35,98.5,24.6,Tree,Guarea_glabra,
7,10,NA,5,NA,25.3,Palm,Astrocaryum_mexicanum,
7,11,NA,4.5,NA,31,Palm,Astrocaryum_mexicanum,
7,12,NA,33.42,105,32.6,Tree,Brosimum_alicastrum,
7,13,NA,4.3,NA,35.4,Palm,Astrocaryum_mexicanum,
7,14,NA,4.1,NA,35.4,Palm,Astrocaryum_mexicanum,
7,15,NA,5.7,NA,37,Palm,Astrocaryum_mexicanum,
7,16,NA,5.5,NA,37.3,Palm,Astrocaryum_mexicanum,
7,17,NA,7.9,NA,43,Tree,Trophis_mexicanum,
7,18,NA,4.9,NA,47.2,Palm,Astrocaryum_mexicanum,
8,1,NA,6.3,NA,0,Tree,Poulsenia_armata,
8,2,NA,21.17,66.5,2.4,Tree,Pterocarpus_rohrii,
8,3,NA,3.5,NA,1.7,Tree,Connarus_schultesii,
8,4,NA,5.3,NA,3.3,Tree,Kwanophyllum_sp,
8,5,NA,4.3,NA,5.1,Tree,Pseudolmedia_glabrata,
8,6,NA,2,NA,7,Palm,Bactris_mexicana,
8,7,NA,5.9,NA,9.9,Palm,Astrocaryum_mexicanum,
8,8,NA,4.9,NA,11.9,Palm,Astrocaryum_mexicanum,
8,9,NA,13.69,43,13.4,Tree,Faramea_occidentalis,
8,10,NA,4.1,NA,15.3,Palm,Astrocaryum_mexicanum,
8,11,NA,32.15,101,16.3,Tree,Poulsenia_armata,
8,12,NA,1,NA,17.4,Tree,Ardisia_brevipes,
8,13,NA,1,NA,16.8,Tree,Psychotria_veracruzense,
8,14,NA,4.9,NA,19.5,Tree,Hampea_nutricia,
8,15,NA,4.1,NA,19.4,Tree,Siparuna_andina,
8,15,NA,1.9,NA,19.4,Tree,Siparuna_andina,
8,16,NA,1.5,NA,19.7,Tree,Dendropanax_arboreus,
8,17,NA,1.1,NA,20.1,Tree,Genipa_americana,
8,18,NA,1.2,NA,20.4,Tree,Pseudolmedia_glabrata,
8,19,NA,1.2,NA,21.3,Tree,Genipa_americana,
8,20,NA,2.3,NA,22.3,Tree,Trichilia_breviflora,
8,21,NA,1.4,NA,22.7,Tree,Pseudolmedia_glabrata,
8,22,NA,1.6,NA,23.2,Tree,Genipa_americana,
8,23,NA,4.5,NA,23.6,Tree,Alchornea_latifolia,
8,24,NA,4.2,NA,23.8,Tree,Siparuna_andina,
8,25,NA,21.96,69,26.6,Tree,Cynometra_retusa,
8,26,NA,4.2,NA,27.8,Palm,Astrocaryum_mexicanum,
8,27,NA,1,NA,29.3,Tree,Chamaedorea_ernesti_augusti,
8,28,NA,5.7,NA,31.4,Palm,Astrocaryum_mexicanum,
8,29,NA,5.2,NA,33,Palm,Astrocaryum_mexicanum,
8,30,NA,2.5,NA,34.3,Tree,Faramea_occidentalis,
8,31,NA,4.4,NA,34.7,Tree,Faramea_occidentalis,
8,32,NA,1,NA,35.4,Tree,Trophis_mexicanum,
8,33,NA,2.8,NA,37,Tree,Acalypha_skutchii,
8,34,NA,1.4,NA,36.4,Tree,Faramea_occidentalis,
8,35,NA,1.3,NA,37.7,Palm,Chamaedorea_pinnatifrons,
8,36,NA,2.7,NA,37.8,Tree,Pouteria_rhynchocarpa,
8,37,NA,1,NA,37.7,Palm,Chamaedorea_pinnatifrons,
8,38,NA,5,NA,40.1,Palm,Astrocaryum_mexicanum,
8,39,NA,5.2,NA,43.6,Palm,Astrocaryum_mexicanum,
8,40,NA,1.1,NA,43.6,Palm,Chamaedorea_pinnatifrons,
8,41,NA,1.8,NA,45.3,Palm,Chamaedorea_oblongata,
8,42,NA,2.2,NA,46.1,Tree,Neea_psychotroides,
8,43,NA,1.7,NA,46.1,Palm,Chamaedorea_oblongata,
8,44,NA,3.9,NA,48.1,Palm,Astrocaryum_mexicanum,
8,45,NA,2,NA,50,Palm,Bactris_mexicana,
9,1,NA,150,NA,0,Tree,Brosimum_alicastrum,
9,2,NA,4.3,NA,3.7,Palm,Astrocaryum_mexicanum,
9,3,NA,6.9,NA,5.7,Tree,Psychotria_faxlucens,
9,4,NA,54.43,171,8.5,Tree,Nectandra_ambigens,
9,5,NA,5.5,NA,9.5,Palm,Astrocaryum_mexicanum,
9,6,NA,4.6,NA,11.7,Palm,Astrocaryum_mexicanum,
9,7,NA,4.5,NA,11.4,Palm,Astrocaryum_mexicanum,
9,8,NA,43.61,137,13.8,Tree,Licaria_velutina,
9,9,2.2,NA,NA,14.6,Liana,Fornsteronia_pandurata,Liana
9,10,NA,5.4,NA,15.8,Palm,Astrocaryum_mexicanum,
9,11,NA,4.7,NA,16.9,Palm,Astrocaryum_mexicanum,
9,12,NA,4.4,NA,16.1,Palm,Astrocaryum_mexicanum,
9,13,NA,2.5,NA,19.7,Tree,Cymbopetalum_baillonii,
9,14,NA,2.1,NA,20.6,Tree,Piper_aequale,
9,14,NA,1.7,NA,20.6,Tree,Piper_aequale,
9,14,NA,2.4,NA,20.6,Tree,Piper_aequale,
9,14,NA,1.2,NA,20.6,Tree,Piper_aequale,
9,14,NA,1.6,NA,20.6,Tree,Piper_aequale,
9,14,NA,1.5,NA,20.6,Tree,Piper_aequale,
9,15,NA,4.9,NA,22.7,Palm,Astrocaryum_mexicanum,
9,16,NA,35.02,110,24.5,Tree,Quararibea_funebris,
9,17,NA,5.6,NA,24.9,Palm,Astrocaryum_mexicanum,
9,18,NA,4.7,NA,26.1,Palm,Astrocaryum_mexicanum,
9,20,NA,1,NA,32.8,Palm,Chamaedorea_pinnatifrons,
9,21,NA,3.7,NA,33.9,Tree,Trophis_mexicanum,
9,22,NA,1,NA,34.1,Palm,Chamaedorea_pinnatifrons,
9,23,NA,4,NA,29.5,Palm,Astrocaryum_mexicanum,
9,19,NA,2.9,NA,30.6,Tree,Omphalea_oleifera,
9,24,NA,4.5,NA,34.3,Palm,Astrocaryum_mexicanum,
9,25,NA,5,NA,33.5,Palm,Astrocaryum_mexicanum,
9,26,NA,60.8,191,37.5,Tree,Guarea_glabra,
9,27,NA,2.3,NA,38.5,Tree,Piper_aequale,
9,28,NA,5.8,NA,39.3,Palm,Astrocaryum_mexicanum,
9,29,NA,13.21,41.5,42,Tree,Psychotria_faxlucens,
9,30,NA,1.7,NA,42.2,Tree,Trophis_mexicanum,
9,31,NA,1.8,NA,43.8,Tree,Pseudolmedia_glabrata,
9,31,NA,1.4,NA,43.8,Tree,Pseudolmedia_glabrata,
9,32,NA,4.9,NA,46.5,Tree,Faramea_occidentalis,
9,33,NA,5.9,NA,47.9,Palm,Astrocaryum_mexicanum,
9,34,NA,3.4,NA,49.3,Tree,Saurauia_scabrida,
9,34,NA,2.9,NA,49.3,Tree,Saurauia_scabrida,
9,34,NA,3.3,NA,49.3,Tree,Saurauia_scabrida,
9,34,NA,1.6,NA,49.3,Tree,Saurauia_scabrida,
9,34,NA,5.3,NA,49.3,Tree,Saurauia_scabrida,
9,34,NA,7.7,NA,49.3,Tree,Saurauia_scabrida,
9,34,NA,3.2,NA,49.3,Tree,Saurauia_scabrida,
9,34,NA,1.9,NA,49.3,Tree,Saurauia_scabrida,
9,34,NA,1.9,NA,49.3,Tree,Saurauia_scabrida,
9,34,NA,1.4,NA,49.3,Tree,Saurauia_scabrida,
9,34,NA,1.3,NA,49.3,Tree,Saurauia_scabrida,
9,34,NA,2.4,NA,49.3,Tree,Saurauia_scabrida,
9,34,NA,1.8,NA,49.3,Tree,Saurauia_scabrida,
9,34,NA,7.6,NA,49.3,Tree,Saurauia_scabrida,
9,34,NA,37.24,117,49.3,Tree,Saurauia_scabrida,
9,34,NA,30.24,95,49.3,Tree,Saurauia_scabrida,
9,34,NA,7,22,49.3,Tree,Saurauia_scabrida,
9,34,NA,61.75,194,49.3,Tree,Saurauia_scabrida,
10,1,NA,2.9,NA,0,Tree,Psychotria_faxlucens,
10,2,4.8,NA,NA,0,Liana,Fornsteronia_pandurata,Liana
10,4,NA,3,NA,1.4,Tree,Trichilia_breviflora,
10,4,NA,1.9,NA,1.4,Tree,Trichilia_breviflora,
10,5,NA,6.3,NA,2.8,Tree,Trophis_mexicanum,
10,6,NA,2.8,NA,4.2,Tree,Piper_aequale,
10,6,NA,1.7,NA,4.2,Tree,Piper_aequale,
10,6,NA,1.6,NA,4.2,Tree,Piper_aequale,
10,6,NA,0.8,NA,4.2,Tree,Piper_aequale,
10,6,NA,1.3,NA,4.2,Tree,Piper_aequale,
10,6,NA,1.7,NA,4.2,Tree,Piper_aequale,
10,10,NA,13.05,41,5.1,Tree,Trophis_mexicanum,
10,11,NA,9.87,31,7,Tree,Psychotria_faxlucens,
10,12,NA,1,NA,8,Palm,Chamaedorea_pinnatifrons,
10,13,9,NA,NA,9.8,Liana,Salacia_megistophylla,Liana
10,14,NA,2.6,NA,11.2,Tree,Sideroxylon_portoricense,
10,15,NA,1.9,NA,11.2,Tree,Piper_aequale,
10,15,NA,2.1,NA,11.2,Tree,Piper_aequale,
10,15,NA,1,NA,11.2,Tree,Piper_aequale,
10,16,NA,1,NA,12.6,Tree,Trophis_mexicanum,
10,17,NA,3.3,NA,12.8,Tree,Pseudolmedia_glabrata,
10,18,NA,0.9,NA,12.6,Tree,Piper_aequale,
10,18,NA,1.9,NA,12.6,Tree,Piper_aequale,
10,18,NA,1.3,NA,12.6,Tree,Piper_aequale,
10,18,NA,1.7,NA,12.6,Tree,Piper_aequale,
10,18,NA,2.2,NA,12.6,Tree,Piper_aequale,
10,18,NA,1.3,NA,12.6,Tree,Piper_aequale,
10,19,NA,5.9,NA,14.4,Tree,Piper_amalago,
10,19,NA,5.7,NA,14.4,Tree,Piper_amalago,
10,20,NA,6.3,NA,15.5,Palm,Astrocaryum_mexicanum,
10,21,NA,9.3,NA,14.2,Tree,Inga_paterna,
10,22,NA,3.5,NA,17.5,Tree,Trophis_mexicanum,
10,23,NA,1,NA,20,Palm,Chamaedorea_pinnatifrons,
10,24,NA,4.4,NA,20.9,Palm,Geonoma_mexicana,
10,25,NA,1.7,NA,21.1,Tree,Piper_sp,
10,26,NA,1.9,NA,25.2,Tree,Acalypha_diversifolia,
10,26,NA,2.9,NA,25.2,Tree,Acalypha_diversifolia,
10,26,NA,1,NA,25.2,Tree,Acalypha_diversifolia,
10,27,NA,3.9,NA,26,Tree,Trophis_mexicanum,
10,28,NA,2.9,NA,27.2,Palm,Bactris_mexicana,
10,28,NA,2.6,NA,27.2,Palm,Bactris_mexicana,
10,28,NA,2.4,NA,27.2,Palm,Bactris_mexicana,
10,29,NA,3,NA,27.3,Tree,Pseudolmedia_glabrata,
10,30,NA,2.2,NA,28.1,Tree,Trophis_mexicanum,
10,31,NA,1.6,NA,28.2,Tree,Trophis_mexicanum,
10,32,NA,1,NA,28.6,Tree,Omphalea_oleifera,Difference split between trophis and piper (no position recorded)
10,33,NA,9.87,31,29,Tree,Piper_amalago,
10,34,NA,3.6,NA,30.8,Tree,Pseudolmedia_glabrata,
10,35,NA,2.1,NA,31.3,Tree,Piper_lapatifolia,
10,35,NA,1.7,NA,31.3,Tree,Piper_lapatifolia,
10,35,NA,1.5,NA,31.3,Tree,Piper_lapatifolia,
10,35,NA,1.2,NA,31.3,Tree,Piper_lapatifolia,
10,36,NA,4.3,NA,39,Tree,Pseudolmedia_glabrata,
10,37,NA,5.3,NA,41,Tree,Trophis_mexicanum,
10,38,NA,5.1,NA,47.6,Palm,Astrocaryum_mexicanum,
10,39,NA,1.2,NA,47.7,Tree,Trophis_mexicanum,
10,40,NA,5.6,NA,49,Palm,Astrocaryum_mexicanum,

## Sheet: TransectDataHerb
Transect,Number,Position,Species,Family,Type,Order,Unranked1,Unranked2
10,16,15.6,Anthurium_flexile,Araceae,Herb,Alismatales,Monocots,Monocots
10,20,19,Anthurium_flexile,Araceae,Herb,Alismatales,Monocots,Monocots
10,22,24.1,Anthurium_flexile,Araceae,Herb,Alismatales,Monocots,Monocots
10,26,25.68,Anthurium_flexile,Araceae,Herb,Alismatales,Monocots,Monocots
10,28,27.7,Anthurium_flexile,Araceae,Herb,Alismatales,Monocots,Monocots
10,29,28.2,Anthurium_flexile,Araceae,Herb,Alismatales,Monocots,Monocots
10,32,30.39,Anthurium_flexile,Araceae,Herb,Alismatales,Monocots,Monocots
10,33,30.61,Anthurium_flexile,Araceae,Herb,Alismatales,Monocots,Monocots
10,52,48.7,Anthurium_flexile,Araceae,Herb,Alismatales,Monocots,Monocots
9,4,4.72,Anthurium_flexile,Araceae,Herb,Alismatales,Monocots,Monocots
9,12,12.94,Anthurium_flexile,Araceae,Herb,Alismatales,Monocots,Monocots
9,13,14.07,Anthurium_flexile,Araceae,Herb,Alismatales,Monocots,Monocots
9,18,27.2,Anthurium_flexile,Araceae,Herb,Alismatales,Monocots,Monocots
9,19,27.34,Anthurium_flexile,Araceae,Herb,Alismatales,Monocots,Monocots
9,20,28.1,Anthurium_flexile,Araceae,Herb,Alismatales,Monocots,Monocots
9,28,33.9,Anthurium_flexile,Araceae,Herb,Alismatales,Monocots,Monocots
9,33,39.04,Anthurium_flexile,Araceae,Herb,Alismatales,Monocots,Monocots
9,37,49.05,Anthurium_flexile,Araceae,Herb,Alismatales,Monocots,Monocots
6,37,22.6,Anthurium_flexile,Araceae,Herb,Alismatales,Monocots,Monocots
6,38,22.95,Anthurium_flexile,Araceae,Herb,Alismatales,Monocots,Monocots
6,39,23.4,Anthurium_flexile,Araceae,Herb,Alismatales,Monocots,Monocots
5,12,8.1,Anthurium_flexile,Araceae,Herb,Alismatales,Monocots,Monocots
5,14,11.85,Anthurium_flexile,Araceae,Herb,Alismatales,Monocots,Monocots
5,15,11.95,Anthurium_flexile,Araceae,Herb,Alismatales,Monocots,Monocots
5,37,29.8,Anthurium_flexile,Araceae,Herb,Alismatales,Monocots,Monocots
5,38,29.95,Anthurium_flexile,Araceae,Herb,Alismatales,Monocots,Monocots
5,41,30.1,Anthurium_flexile,Araceae,Herb,Alismatales,Monocots,Monocots
5,42,31.4,Anthurium_flexile,Araceae,Herb,Alismatales,Monocots,Monocots
5,44,32.7,Anthurium_flexile,Araceae,Herb,Alismatales,Monocots,Monocots
5,46,35.15,Anthurium_flexile,Araceae,Herb,Alismatales,Monocots,Monocots
5,50,43.25,Anthurium_flexile,Araceae,Herb,Alismatales,Monocots,Monocots
5,51,43.7,Anthurium_flexile,Araceae,Herb,Alismatales,Monocots,Monocots
5,52,42.1,Anthurium_flexile,Araceae,Herb,Alismatales,Monocots,Monocots
5,55,49,Anthurium_flexile,Araceae,Herb,Alismatales,Monocots,Monocots
8,4,16.8,Anthurium_flexile,Araceae,Herb,Alismatales,Monocots,Monocots
8,21,39.7,Anthurium_flexile,Araceae,Herb,Alismatales,Monocots,Monocots
7,2,1.3,Anthurium_flexile,Araceae,Herb,Alismatales,Monocots,Monocots
7,3,3.1,Anthurium_flexile,Araceae,Herb,Alismatales,Monocots,Monocots
7,4,3.8,Anthurium_flexile,Araceae,Herb,Alismatales,Monocots,Monocots
7,5,4.55,Anthurium_flexile,Araceae,Herb,Alismatales,Monocots,Monocots
7,6,5.9,Anthurium_flexile,Araceae,Herb,Alismatales,Monocots,Monocots
7,7,7.35,Anthurium_flexile,Araceae,Herb,Alismatales,Monocots,Monocots
7,8,8.7,Anthurium_flexile,Araceae,Herb,Alismatales,Monocots,Monocots
7,9,9.6,Anthurium_flexile,Araceae,Herb,Alismatales,Monocots,Monocots
7,10,1.7,Anthurium_flexile,Araceae,Herb,Alismatales,Monocots,Monocots
7,12,13.25,Anthurium_flexile,Araceae,Herb,Alismatales,Monocots,Monocots
7,14,16.2,Anthurium_flexile,Araceae,Herb,Alismatales,Monocots,Monocots
7,15,17.55,Anthurium_flexile,Araceae,Herb,Alismatales,Monocots,Monocots
7,19,20.4,Anthurium_flexile,Araceae,Herb,Alismatales,Monocots,Monocots
7,20,20.5,Anthurium_flexile,Araceae,Herb,Alismatales,Monocots,Monocots
7,21,21.3,Anthurium_flexile,Araceae,Herb,Alismatales,Monocots,Monocots
7,26,34.2,Anthurium_flexile,Araceae,Herb,Alismatales,Monocots,Monocots
7,28,35.3,Anthurium_flexile,Araceae,Herb,Alismatales,Monocots,Monocots
7,29,36.5,Anthurium_flexile,Araceae,Herb,Alismatales,Monocots,Monocots
7,30,38.45,Anthurium_flexile,Araceae,Herb,Alismatales,Monocots,Monocots
7,31,38.85,Anthurium_flexile,Araceae,Herb,Alismatales,Monocots,Monocots
7,32,38.9,Anthurium_flexile,Araceae,Herb,Alismatales,Monocots,Monocots
7,35,40.75,Anthurium_flexile,Araceae,Herb,Alismatales,Monocots,Monocots
7,40,40.8,Anthurium_flexile,Araceae,Herb,Alismatales,Monocots,Monocots
7,41,41.6,Anthurium_flexile,Araceae,Herb,Alismatales,Monocots,Monocots
7,42,41.9,Anthurium_flexile,Araceae,Herb,Alismatales,Monocots,Monocots
7,44,42.85,Anthurium_flexile,Araceae,Herb,Alismatales,Monocots,Monocots
7,45,43,Anthurium_flexile,Araceae,Herb,Alismatales,Monocots,Monocots
7,46,43.4,Anthurium_flexile,Araceae,Herb,Alismatales,Monocots,Monocots
7,47,43.97,Anthurium_flexile,Araceae,Herb,Alismatales,Monocots,Monocots
7,48,44.38,Anthurium_flexile,Araceae,Herb,Alismatales,Monocots,Monocots
7,49,45.57,Anthurium_flexile,Araceae,Herb,Alismatales,Monocots,Monocots
7,50,48.1,Anthurium_flexile,Araceae,Herb,Alismatales,Monocots,Monocots
4,15,13.7,Anthurium_flexile,Araceae,Herb,Alismatales,Monocots,Monocots
4,16,13.95,Anthurium_flexile,Araceae,Herb,Alismatales,Monocots,Monocots
4,17,14.4,Anthurium_flexile,Araceae,Herb,Alismatales,Monocots,Monocots
4,18,16.2,Anthurium_flexile,Araceae,Herb,Alismatales,Monocots,Monocots
4,21,21.95,Anthurium_flexile,Araceae,Herb,Alismatales,Monocots,Monocots
4,23,25.94,Anthurium_flexile,Araceae,Herb,Alismatales,Monocots,Monocots
4,27,36.35,Anthurium_flexile,Araceae,Herb,Alismatales,Monocots,Monocots
4,28,36.4,Anthurium_flexile,Araceae,Herb,Alismatales,Monocots,Monocots
3,28,12.55,Anthurium_flexile,Araceae,Herb,Alismatales,Monocots,Monocots
3,31,15.8,Anthurium_flexile,Araceae,Herb,Alismatales,Monocots,Monocots
3,33,16.3,Anthurium_flexile,Araceae,Herb,Alismatales,Monocots,Monocots
3,34,17,Anthurium_flexile,Araceae,Herb,Alismatales,Monocots,Monocots
3,39,17.9,Anthurium_flexile,Araceae,Herb,Alismatales,Monocots,Monocots
3,41,20.85,Anthurium_flexile,Araceae,Herb,Alismatales,Monocots,Monocots
3,42,21.2,Anthurium_flexile,Araceae,Herb,Alismatales,Monocots,Monocots
3,43,21.33,Anthurium_flexile,Araceae,Herb,Alismatales,Monocots,Monocots
3,46,21.95,Anthurium_flexile,Araceae,Herb,Alismatales,Monocots,Monocots
3,50,23.07,Anthurium_flexile,Araceae,Herb,Alismatales,Monocots,Monocots
3,52,23.3,Anthurium_flexile,Araceae,Herb,Alismatales,Monocots,Monocots
3,53,23.4,Anthurium_flexile,Araceae,Herb,Alismatales,Monocots,Monocots
3,63,30.05,Anthurium_flexile,Araceae,Herb,Alismatales,Monocots,Monocots
3,74,33.5,Anthurium_flexile,Araceae,Herb,Alismatales,Monocots,Monocots
2,7,2.45,Anthurium_flexile,Araceae,Herb,Alismatales,Monocots,Monocots
2,13,13,Anthurium_flexile,Araceae,Herb,Alismatales,Monocots,Monocots
2,14,13.3,Anthurium_flexile,Araceae,Herb,Alismatales,Monocots,Monocots
2,20,22.3,Anthurium_flexile,Araceae,Herb,Alismatales,Monocots,Monocots
1,3,0.6,Anthurium_flexile,Araceae,Herb,Alismatales,Monocots,Monocots
1,9,4.5,Anthurium_flexile,Araceae,Herb,Alismatales,Monocots,Monocots
1,11,6.45,Anthurium_flexile,Araceae,Herb,Alismatales,Monocots,Monocots
1,15,8.75,Anthurium_flexile,Araceae,Herb,Alismatales,Monocots,Monocots
1,19,10.8,Anthurium_flexile,Araceae,Herb,Alismatales,Monocots,Monocots
1,20,10.9,Anthurium_flexile,Araceae,Herb,Alismatales,Monocots,Monocots
1,21,11.8,Anthurium_flexile,Araceae,Herb,Alismatales,Monocots,Monocots
1,22,11.9,Anthurium_flexile,Araceae,Herb,Alismatales,Monocots,Monocots
1,30,22.05,Anthurium_flexile,Araceae,Herb,Alismatales,Monocots,Monocots
1,38,27.7,Anthurium_flexile,Araceae,Herb,Alismatales,Monocots,Monocots
1,49,33.62,Anthurium_flexile,Araceae,Herb,Alismatales,Monocots,Monocots
1,50,34.6,Anthurium_flexile,Araceae,Herb,Alismatales,Monocots,Monocots
1,52,35.85,Anthurium_flexile,Araceae,Herb,Alismatales,Monocots,Monocots
1,69,49,Anthurium_flexile,Araceae,Herb,Alismatales,Monocots,Monocots
6,21,5.6,Anthurium_pentaphyllum,Araceae,Herb,Alismatales,Monocots,Monocots
8,14,31.35,Anthurium_pentaphyllum,Araceae,Herb,Alismatales,Monocots,Monocots
8,16,38.6,Anthurium_pentaphyllum,Araceae,Herb,Alismatales,Monocots,Monocots
8,19,39.05,Anthurium_pentaphyllum,Araceae,Herb,Alismatales,Monocots,Monocots
3,9,5.35,Anthurium_pentaphyllum,Araceae,Herb,Alismatales,Monocots,Monocots
3,51,23.2,Anthurium_pentaphyllum,Araceae,Herb,Alismatales,Monocots,Monocots
2,23,27.7,Anthurium_schlesei,Araceae,Herb,Alismatales,Monocots,Monocots
10,25,25.64,Aphelandra_aurantiaca,Acanthaceae,Subshrub,Lamiales,Asterids,Eudicots
6,14,3.5,Aphelandra_aurantiaca,Acanthaceae,Subshrub,Lamiales,Asterids,Eudicots
6,29,11.85,Aphelandra_aurantiaca,Acanthaceae,Subshrub,Lamiales,Asterids,Eudicots
6,32,14.35,Aphelandra_aurantiaca,Acanthaceae,Subshrub,Lamiales,Asterids,Eudicots
6,33,21.1,Aphelandra_aurantiaca,Acanthaceae,Subshrub,Lamiales,Asterids,Eudicots
6,41,24,Aphelandra_aurantiaca,Acanthaceae,Subshrub,Lamiales,Asterids,Eudicots
6,68,34.6,Aphelandra_aurantiaca,Acanthaceae,Subshrub,Lamiales,Asterids,Eudicots
5,18,14.45,Aphelandra_aurantiaca,Acanthaceae,Subshrub,Lamiales,Asterids,Eudicots
8,8,19.75,Aphelandra_aurantiaca,Acanthaceae,Subshrub,Lamiales,Asterids,Eudicots
7,11,12.65,Aphelandra_aurantiaca,Acanthaceae,Subshrub,Lamiales,Asterids,Eudicots
7,13,13.55,Aphelandra_aurantiaca,Acanthaceae,Subshrub,Lamiales,Asterids,Eudicots
4,20,17.5,Aphelandra_aurantiaca,Acanthaceae,Subshrub,Lamiales,Asterids,Eudicots
2,8,2.5,Aphelandra_aurantiaca,Acanthaceae,Subshrub,Lamiales,Asterids,Eudicots
1,45,32.5,Aphelandra_aurantiaca,Acanthaceae,Subshrub,Lamiales,Asterids,Eudicots
10,1,0,Bolbitis_bernouilli,Lomariopsidaceae,Fern,Polypodiales,Polypodiopsida,Pteridophyta
10,4,4.3,Bolbitis_bernouilli,Lomariopsidaceae,Fern,Polypodiales,Polypodiopsida,Pteridophyta
10,19,18.53,Bolbitis_bernouilli,Lomariopsidaceae,Fern,Polypodiales,Polypodiopsida,Pteridophyta
9,6,6.1,Bolbitis_bernouilli,Lomariopsidaceae,Fern,Polypodiales,Polypodiopsida,Pteridophyta
9,10,10.4,Bolbitis_bernouilli,Lomariopsidaceae,Fern,Polypodiales,Polypodiopsida,Pteridophyta
9,11,11.6,Bolbitis_bernouilli,Lomariopsidaceae,Fern,Polypodiales,Polypodiopsida,Pteridophyta
9,21,28.93,Bolbitis_bernouilli,Lomariopsidaceae,Fern,Polypodiales,Polypodiopsida,Pteridophyta
9,34,40.04,Bolbitis_bernouilli,Lomariopsidaceae,Fern,Polypodiales,Polypodiopsida,Pteridophyta
9,35,42.15,Bolbitis_bernouilli,Lomariopsidaceae,Fern,Polypodiales,Polypodiopsida,Pteridophyta
8,11,28,Bolbitis_bernouilli,Lomariopsidaceae,Fern,Polypodiales,Polypodiopsida,Pteridophyta
2,29,49.15,Bolbitis_bernouilli,Lomariopsidaceae,Fern,Polypodiales,Polypodiopsida,Pteridophyta
1,18,10.2,Calathea_microchlamis,Marantaceae,Herb,Zingiberales,Commelinids,Monocots
1,71,45.7,Costus_dirzoii,Costaceae,Herb,Zingiberales,Commelinids,Monocots
9,22,30.61,Costus_scaber,Costaceae,Herb,Zingiberales,Commelinids,Monocots
6,50,27.2,Costus_scaber,Costaceae,Herb,Zingiberales,Commelinids,Monocots
10,11,8.1,Dieffenbachia_seguine,Araceae,Herb,Alismatales,Monocots,Monocots
6,3,0.7,Dieffenbachia_seguine,Araceae,Herb,Alismatales,Monocots,Monocots
6,5,1.2,Dieffenbachia_seguine,Araceae,Herb,Alismatales,Monocots,Monocots
6,6,1.5,Dieffenbachia_seguine,Araceae,Herb,Alismatales,Monocots,Monocots
6,15,3.9,Dieffenbachia_seguine,Araceae,Herb,Alismatales,Monocots,Monocots
6,19,4.2,Dieffenbachia_seguine,Araceae,Herb,Alismatales,Monocots,Monocots
6,20,4.5,Dieffenbachia_seguine,Araceae,Herb,Alismatales,Monocots,Monocots
6,23,8.3,Dieffenbachia_seguine,Araceae,Herb,Alismatales,Monocots,Monocots
6,34,21.3,Dieffenbachia_seguine,Araceae,Herb,Alismatales,Monocots,Monocots
6,36,22.45,Dieffenbachia_seguine,Araceae,Herb,Alismatales,Monocots,Monocots
6,52,27.95,Dieffenbachia_seguine,Araceae,Herb,Alismatales,Monocots,Monocots
6,54,29.3,Dieffenbachia_seguine,Araceae,Herb,Alismatales,Monocots,Monocots
6,65,33.8,Dieffenbachia_seguine,Araceae,Herb,Alismatales,Monocots,Monocots
6,71,35.7,Dieffenbachia_seguine,Araceae,Herb,Alismatales,Monocots,Monocots
6,72,37.4,Dieffenbachia_seguine,Araceae,Herb,Alismatales,Monocots,Monocots
5,21,21.05,Dieffenbachia_seguine,Araceae,Herb,Alismatales,Monocots,Monocots
5,22,21.7,Dieffenbachia_seguine,Araceae,Herb,Alismatales,Monocots,Monocots
5,26,24.7,Dieffenbachia_seguine,Araceae,Herb,Alismatales,Monocots,Monocots
5,39,30.05,Dieffenbachia_seguine,Araceae,Herb,Alismatales,Monocots,Monocots
5,53,47.6,Dieffenbachia_seguine,Araceae,Herb,Alismatales,Monocots,Monocots
3,96,41.8,Dieffenbachia_seguine,Araceae,Herb,Alismatales,Monocots,Monocots
3,97,42.1,Dieffenbachia_seguine,Araceae,Herb,Alismatales,Monocots,Monocots
2,15,13.85,Dieffenbachia_seguine,Araceae,Herb,Alismatales,Monocots,Monocots
2,16,14.45,Dieffenbachia_seguine,Araceae,Herb,Alismatales,Monocots,Monocots
10,12,12.1,Diplazium_lonchophyllum,Athyriaceae,Fern,Polypodiales,Polypodiopsida,Pteridophyta
10,34,30.95,Diplazium_lonchophyllum,Athyriaceae,Fern,Polypodiales,Polypodiopsida,Pteridophyta
10,43,44.01,Diplazium_lonchophyllum,Athyriaceae,Fern,Polypodiales,Polypodiopsida,Pteridophyta
10,50,47.34,Diplazium_lonchophyllum,Athyriaceae,Fern,Polypodiales,Polypodiopsida,Pteridophyta
9,15,18.8,Diplazium_lonchophyllum,Athyriaceae,Fern,Polypodiales,Polypodiopsida,Pteridophyta
9,23,32.05,Diplazium_lonchophyllum,Athyriaceae,Fern,Polypodiales,Polypodiopsida,Pteridophyta
9,25,32.71,Diplazium_lonchophyllum,Athyriaceae,Fern,Polypodiales,Polypodiopsida,Pteridophyta
9,26,32.95,Diplazium_lonchophyllum,Athyriaceae,Fern,Polypodiales,Polypodiopsida,Pteridophyta
9,27,33.2,Diplazium_lonchophyllum,Athyriaceae,Fern,Polypodiales,Polypodiopsida,Pteridophyta
9,29,34.4,Diplazium_lonchophyllum,Athyriaceae,Fern,Polypodiales,Polypodiopsida,Pteridophyta
6,70,35.2,Diplazium_lonchophyllum,Athyriaceae,Fern,Polypodiales,Polypodiopsida,Pteridophyta
6,82,43.9,Diplazium_lonchophyllum,Athyriaceae,Fern,Polypodiales,Polypodiopsida,Pteridophyta
8,7,19.55,Diplazium_lonchophyllum,Athyriaceae,Fern,Polypodiales,Polypodiopsida,Pteridophyta
8,18,38.61,Diplazium_lonchophyllum,Athyriaceae,Fern,Polypodiales,Polypodiopsida,Pteridophyta
8,22,39.8,Diplazium_lonchophyllum,Athyriaceae,Fern,Polypodiales,Polypodiopsida,Pteridophyta
7,18,20.3,Diplazium_lonchophyllum,Athyriaceae,Fern,Polypodiales,Polypodiopsida,Pteridophyta
4,2,1.4,Diplazium_lonchophyllum,Athyriaceae,Fern,Polypodiales,Polypodiopsida,Pteridophyta
4,19,17.35,Diplazium_lonchophyllum,Athyriaceae,Fern,Polypodiales,Polypodiopsida,Pteridophyta
4,24,28,Diplazium_lonchophyllum,Athyriaceae,Fern,Polypodiales,Polypodiopsida,Pteridophyta
4,25,34.1,Diplazium_lonchophyllum,Athyriaceae,Fern,Polypodiales,Polypodiopsida,Pteridophyta
4,34,40.35,Diplazium_lonchophyllum,Athyriaceae,Fern,Polypodiales,Polypodiopsida,Pteridophyta
4,43,49.2,Diplazium_lonchophyllum,Athyriaceae,Fern,Polypodiales,Polypodiopsida,Pteridophyta
3,3,3.05,Diplazium_lonchophyllum,Athyriaceae,Fern,Polypodiales,Polypodiopsida,Pteridophyta
3,32,16.2,Diplazium_lonchophyllum,Athyriaceae,Fern,Polypodiales,Polypodiopsida,Pteridophyta
2,6,2.7,Diplazium_lonchophyllum,Athyriaceae,Fern,Polypodiales,Polypodiopsida,Pteridophyta
2,12,12.7,Diplazium_lonchophyllum,Athyriaceae,Fern,Polypodiales,Polypodiopsida,Pteridophyta
2,18,15.6,Diplazium_lonchophyllum,Athyriaceae,Fern,Polypodiales,Polypodiopsida,Pteridophyta
2,25,33.9,Diplazium_lonchophyllum,Athyriaceae,Fern,Polypodiales,Polypodiopsida,Pteridophyta
2,28,37.2,Diplazium_lonchophyllum,Athyriaceae,Fern,Polypodiales,Polypodiopsida,Pteridophyta
1,10,3.2,Diplazium_lonchophyllum,Athyriaceae,Fern,Polypodiales,Polypodiopsida,Pteridophyta
1,12,7.4,Diplazium_lonchophyllum,Athyriaceae,Fern,Polypodiales,Polypodiopsida,Pteridophyta
1,13,7.9,Diplazium_lonchophyllum,Athyriaceae,Fern,Polypodiales,Polypodiopsida,Pteridophyta
1,14,8.45,Diplazium_lonchophyllum,Athyriaceae,Fern,Polypodiales,Polypodiopsida,Pteridophyta
1,16,9.15,Diplazium_lonchophyllum,Athyriaceae,Fern,Polypodiales,Polypodiopsida,Pteridophyta
1,17,9.6,Diplazium_lonchophyllum,Athyriaceae,Fern,Polypodiales,Polypodiopsida,Pteridophyta
1,28,20,Diplazium_lonchophyllum,Athyriaceae,Fern,Polypodiales,Polypodiopsida,Pteridophyta
1,32,23.9,Diplazium_lonchophyllum,Athyriaceae,Fern,Polypodiales,Polypodiopsida,Pteridophyta
1,42,31.3,Diplazium_lonchophyllum,Athyriaceae,Fern,Polypodiales,Polypodiopsida,Pteridophyta
1,44,32,Diplazium_lonchophyllum,Athyriaceae,Fern,Polypodiales,Polypodiopsida,Pteridophyta
1,47,33,Diplazium_lonchophyllum,Athyriaceae,Fern,Polypodiales,Polypodiopsida,Pteridophyta
1,54,36.2,Diplazium_lonchophyllum,Athyriaceae,Fern,Polypodiales,Polypodiopsida,Pteridophyta
1,65,45.4,Diplazium_lonchophyllum,Athyriaceae,Fern,Polypodiales,Polypodiopsida,Pteridophyta
1,67,47.5,Diplazium_lonchophyllum,Athyriaceae,Fern,Polypodiales,Polypodiopsida,Pteridophyta
10,47,45.31,Lygodium_heterodoxum,Lygodiaceae,Fern,Schizaeales,Polypodiopsida,Pteridophyta
10,2,4.9,Monstera_acuminata,Araceae,Herb,Alismatales,Monocots,Monocots
10,3,5.5,Monstera_acuminata,Araceae,Herb,Alismatales,Monocots,Monocots
10,7,6.5,Monstera_acuminata,Araceae,Herb,Alismatales,Monocots,Monocots
10,9,7.1,Monstera_acuminata,Araceae,Herb,Alismatales,Monocots,Monocots
10,10,7.2,Monstera_acuminata,Araceae,Herb,Alismatales,Monocots,Monocots
10,51,48.35,Monstera_acuminata,Araceae,Herb,Alismatales,Monocots,Monocots
9,1,1.8,Monstera_acuminata,Araceae,Herb,Alismatales,Monocots,Monocots
9,3,3.45,Monstera_acuminata,Araceae,Herb,Alismatales,Monocots,Monocots
9,5,5.82,Monstera_acuminata,Araceae,Herb,Alismatales,Monocots,Monocots
6,1,0.4,Monstera_acuminata,Araceae,Herb,Alismatales,Monocots,Monocots
6,7,1.6,Monstera_acuminata,Araceae,Herb,Alismatales,Monocots,Monocots
6,9,1.8,Monstera_acuminata,Araceae,Herb,Alismatales,Monocots,Monocots
6,22,8.2,Monstera_acuminata,Araceae,Herb,Alismatales,Monocots,Monocots
6,25,9.2,Monstera_acuminata,Araceae,Herb,Alismatales,Monocots,Monocots
6,26,10.4,Monstera_acuminata,Araceae,Herb,Alismatales,Monocots,Monocots
6,49,27.1,Monstera_acuminata,Araceae,Herb,Alismatales,Monocots,Monocots
6,55,30.6,Monstera_acuminata,Araceae,Herb,Alismatales,Monocots,Monocots
6,56,30.9,Monstera_acuminata,Araceae,Herb,Alismatales,Monocots,Monocots
6,57,31.1,Monstera_acuminata,Araceae,Herb,Alismatales,Monocots,Monocots
6,60,31.7,Monstera_acuminata,Araceae,Herb,Alismatales,Monocots,Monocots
6,61,32.1,Monstera_acuminata,Araceae,Herb,Alismatales,Monocots,Monocots
6,62,32.5,Monstera_acuminata,Araceae,Herb,Alismatales,Monocots,Monocots
6,66,34,Monstera_acuminata,Araceae,Herb,Alismatales,Monocots,Monocots
6,67,34.2,Monstera_acuminata,Araceae,Herb,Alismatales,Monocots,Monocots
6,75,40.1,Monstera_acuminata,Araceae,Herb,Alismatales,Monocots,Monocots
6,85,47.45,Monstera_acuminata,Araceae,Herb,Alismatales,Monocots,Monocots
5,4,4.1,Monstera_acuminata,Araceae,Herb,Alismatales,Monocots,Monocots
5,6,4.75,Monstera_acuminata,Araceae,Herb,Alismatales,Monocots,Monocots
5,7,5.25,Monstera_acuminata,Araceae,Herb,Alismatales,Monocots,Monocots
5,8,5.35,Monstera_acuminata,Araceae,Herb,Alismatales,Monocots,Monocots
8,15,33.6,Monstera_acuminata,Araceae,Herb,Alismatales,Monocots,Monocots
3,102,44.5,Monstera_acuminata,Araceae,Herb,Alismatales,Monocots,Monocots
3,103,45.4,Monstera_acuminata,Araceae,Herb,Alismatales,Monocots,Monocots
3,107,49.58,Monstera_acuminata,Araceae,Herb,Alismatales,Monocots,Monocots
3,109,49.8,Monstera_acuminata,Araceae,Herb,Alismatales,Monocots,Monocots
3,110,50,Monstera_acuminata,Araceae,Herb,Alismatales,Monocots,Monocots
2,1,0.2,Monstera_acuminata,Araceae,Herb,Alismatales,Monocots,Monocots
2,30,50,Monstera_acuminata,Araceae,Herb,Alismatales,Monocots,Monocots
1,1,0,Monstera_acuminata,Araceae,Herb,Alismatales,Monocots,Monocots
1,4,1.3,Monstera_acuminata,Araceae,Herb,Alismatales,Monocots,Monocots
1,5,1.6,Monstera_acuminata,Araceae,Herb,Alismatales,Monocots,Monocots
1,7,2.45,Monstera_acuminata,Araceae,Herb,Alismatales,Monocots,Monocots
1,26,18.9,Monstera_acuminata,Araceae,Herb,Alismatales,Monocots,Monocots
1,27,19.1,Monstera_acuminata,Araceae,Herb,Alismatales,Monocots,Monocots
1,48,33.5,Monstera_acuminata,Araceae,Herb,Alismatales,Monocots,Monocots
1,62,42.05,Monstera_acuminata,Araceae,Herb,Alismatales,Monocots,Monocots
1,66,46,Monstera_acuminata,Araceae,Herb,Alismatales,Monocots,Monocots
10,41,41.43,Philodendron_guatemalensis,Araceae,Herb,Alismatales,Monocots,Monocots
10,42,43.4,Philodendron_guatemalensis,Araceae,Herb,Alismatales,Monocots,Monocots
9,17,23.05,Philodendron_guatemalensis,Araceae,Herb,Alismatales,Monocots,Monocots
9,31,37.15,Philodendron_guatemalensis,Araceae,Herb,Alismatales,Monocots,Monocots
6,73,39,Philodendron_guatemalensis,Araceae,Herb,Alismatales,Monocots,Monocots
6,86,47.6,Philodendron_guatemalensis,Araceae,Herb,Alismatales,Monocots,Monocots
6,87,48.5,Philodendron_guatemalensis,Araceae,Herb,Alismatales,Monocots,Monocots
5,2,0.15,Philodendron_guatemalensis,Araceae,Herb,Alismatales,Monocots,Monocots
7,23,27.5,Philodendron_guatemalensis,Araceae,Herb,Alismatales,Monocots,Monocots
7,24,29.2,Philodendron_guatemalensis,Araceae,Herb,Alismatales,Monocots,Monocots
4,1,0.3,Philodendron_guatemalensis,Araceae,Herb,Alismatales,Monocots,Monocots
3,2,3.2,Philodendron_guatemalensis,Araceae,Herb,Alismatales,Monocots,Monocots
2,2,0.6,Philodendron_guatemalensis,Araceae,Herb,Alismatales,Monocots,Monocots
2,5,2.45,Philodendron_guatemalensis,Araceae,Herb,Alismatales,Monocots,Monocots
2,24,32.6,Philodendron_guatemalensis,Araceae,Herb,Alismatales,Monocots,Monocots
1,24,17.9,Philodendron_guatemalensis,Araceae,Herb,Alismatales,Monocots,Monocots
1,33,24.6,Philodendron_guatemalensis,Araceae,Herb,Alismatales,Monocots,Monocots
1,34,26.1,Philodendron_guatemalensis,Araceae,Herb,Alismatales,Monocots,Monocots
1,39,29.2,Philodendron_guatemalensis,Araceae,Herb,Alismatales,Monocots,Monocots
1,46,32.7,Philodendron_guatemalensis,Araceae,Herb,Alismatales,Monocots,Monocots
1,58,40.8,Philodendron_guatemalensis,Araceae,Herb,Alismatales,Monocots,Monocots
1,61,42.05,Philodendron_guatemalensis,Araceae,Herb,Alismatales,Monocots,Monocots
1,63,43.05,Philodendron_guatemalensis,Araceae,Herb,Alismatales,Monocots,Monocots
1,64,43.4,Philodendron_guatemalensis,Araceae,Herb,Alismatales,Monocots,Monocots
1,70,49.9,Philodendron_guatemalensis,Araceae,Herb,Alismatales,Monocots,Monocots
10,5,5.7,Philodendron_inaequilaterum,Araceae,Herb,Alismatales,Monocots,Monocots
10,13,14.11,Philodendron_inaequilaterum,Araceae,Herb,Alismatales,Monocots,Monocots
10,14,15.3,Philodendron_inaequilaterum,Araceae,Herb,Alismatales,Monocots,Monocots
10,15,15.5,Philodendron_inaequilaterum,Araceae,Herb,Alismatales,Monocots,Monocots
10,17,16.61,Philodendron_inaequilaterum,Araceae,Herb,Alismatales,Monocots,Monocots
10,23,24.4,Philodendron_inaequilaterum,Araceae,Herb,Alismatales,Monocots,Monocots
10,27,26.55,Philodendron_inaequilaterum,Araceae,Herb,Alismatales,Monocots,Monocots
9,7,6.61,Philodendron_inaequilaterum,Araceae,Herb,Alismatales,Monocots,Monocots
9,9,8.54,Philodendron_inaequilaterum,Araceae,Herb,Alismatales,Monocots,Monocots
6,4,1,Philodendron_inaequilaterum,Araceae,Herb,Alismatales,Monocots,Monocots
6,8,1.7,Philodendron_inaequilaterum,Araceae,Herb,Alismatales,Monocots,Monocots
6,31,13.6,Philodendron_inaequilaterum,Araceae,Herb,Alismatales,Monocots,Monocots
6,35,21.1,Philodendron_inaequilaterum,Araceae,Herb,Alismatales,Monocots,Monocots
6,40,23.6,Philodendron_inaequilaterum,Araceae,Herb,Alismatales,Monocots,Monocots
6,48,26.9,Philodendron_inaequilaterum,Araceae,Herb,Alismatales,Monocots,Monocots
6,58,31.4,Philodendron_inaequilaterum,Araceae,Herb,Alismatales,Monocots,Monocots
6,59,31.6,Philodendron_inaequilaterum,Araceae,Herb,Alismatales,Monocots,Monocots
5,3,3.4,Philodendron_inaequilaterum,Araceae,Herb,Alismatales,Monocots,Monocots
5,9,5.9,Philodendron_inaequilaterum,Araceae,Herb,Alismatales,Monocots,Monocots
1,2,0.45,Philodendron_inaequilaterum,Araceae,Herb,Alismatales,Monocots,Monocots
1,8,2.9,Philodendron_inaequilaterum,Araceae,Herb,Alismatales,Monocots,Monocots
1,53,36.1,Philodendron_inaequilaterum,Araceae,Herb,Alismatales,Monocots,Monocots
10,8,6.85,Philodendron_scandens,Araceae,Herb,Alismatales,Monocots,Monocots
10,48,46.01,Philodendron_scandens,Araceae,Herb,Alismatales,Monocots,Monocots
9,30,34.85,Philodendron_scandens,Araceae,Herb,Alismatales,Monocots,Monocots
9,32,38.41,Philodendron_scandens,Araceae,Herb,Alismatales,Monocots,Monocots
9,38,47.92,Philodendron_scandens,Araceae,Herb,Alismatales,Monocots,Monocots
8,12,30.9,Philodendron_scandens,Araceae,Herb,Alismatales,Monocots,Monocots
2,10,5.8,Philodendron_scandens,Araceae,Herb,Alismatales,Monocots,Monocots
2,11,6.2,Philodendron_scandens,Araceae,Herb,Alismatales,Monocots,Monocots
10,6,6.3,Philodendron_tripartitum,Araceae,Herb,Alismatales,Monocots,Monocots
10,44,45.52,Renealmia_mexicana,Zingiberaceae,Herb,Zingiberales,Commelinids,Monocots
6,10,2.6,Rhodospatha_wendlandii,Araceae,Herb,Alismatales,Monocots,Monocots
6,11,3.1,Rhodospatha_wendlandii,Araceae,Herb,Alismatales,Monocots,Monocots
6,12,3.15,Rhodospatha_wendlandii,Araceae,Herb,Alismatales,Monocots,Monocots
6,16,3.85,Rhodospatha_wendlandii,Araceae,Herb,Alismatales,Monocots,Monocots
6,17,4,Rhodospatha_wendlandii,Araceae,Herb,Alismatales,Monocots,Monocots
6,18,4.1,Rhodospatha_wendlandii,Araceae,Herb,Alismatales,Monocots,Monocots
6,24,8.45,Rhodospatha_wendlandii,Araceae,Herb,Alismatales,Monocots,Monocots
6,83,45.05,Rhodospatha_wendlandii,Araceae,Herb,Alismatales,Monocots,Monocots
6,88,49.4,Rhodospatha_wendlandii,Araceae,Herb,Alismatales,Monocots,Monocots
5,10,7.1,Rhodospatha_wendlandii,Araceae,Herb,Alismatales,Monocots,Monocots
5,11,8.15,Rhodospatha_wendlandii,Araceae,Herb,Alismatales,Monocots,Monocots
5,13,9.35,Rhodospatha_wendlandii,Araceae,Herb,Alismatales,Monocots,Monocots
5,20,20.3,Rhodospatha_wendlandii,Araceae,Herb,Alismatales,Monocots,Monocots
5,28,26.1,Rhodospatha_wendlandii,Araceae,Herb,Alismatales,Monocots,Monocots
5,29,26.2,Rhodospatha_wendlandii,Araceae,Herb,Alismatales,Monocots,Monocots
5,30,26.7,Rhodospatha_wendlandii,Araceae,Herb,Alismatales,Monocots,Monocots
5,31,26.9,Rhodospatha_wendlandii,Araceae,Herb,Alismatales,Monocots,Monocots
5,32,27.1,Rhodospatha_wendlandii,Araceae,Herb,Alismatales,Monocots,Monocots
5,33,28.1,Rhodospatha_wendlandii,Araceae,Herb,Alismatales,Monocots,Monocots
5,34,28.6,Rhodospatha_wendlandii,Araceae,Herb,Alismatales,Monocots,Monocots
5,35,28.9,Rhodospatha_wendlandii,Araceae,Herb,Alismatales,Monocots,Monocots
5,36,29.6,Rhodospatha_wendlandii,Araceae,Herb,Alismatales,Monocots,Monocots
5,40,30.05,Rhodospatha_wendlandii,Araceae,Herb,Alismatales,Monocots,Monocots
5,45,33.5,Rhodospatha_wendlandii,Araceae,Herb,Alismatales,Monocots,Monocots
8,2,13.55,Rhodospatha_wendlandii,Araceae,Herb,Alismatales,Monocots,Monocots
8,10,24.25,Rhodospatha_wendlandii,Araceae,Herb,Alismatales,Monocots,Monocots
8,23,41.5,Rhodospatha_wendlandii,Araceae,Herb,Alismatales,Monocots,Monocots
8,24,41.75,Rhodospatha_wendlandii,Araceae,Herb,Alismatales,Monocots,Monocots
8,25,47.2,Rhodospatha_wendlandii,Araceae,Herb,Alismatales,Monocots,Monocots
7,1,0,Rhodospatha_wendlandii,Araceae,Herb,Alismatales,Monocots,Monocots
4,3,2.7,Rhodospatha_wendlandii,Araceae,Herb,Alismatales,Monocots,Monocots
4,4,3,Rhodospatha_wendlandii,Araceae,Herb,Alismatales,Monocots,Monocots
4,5,3.45,Rhodospatha_wendlandii,Araceae,Herb,Alismatales,Monocots,Monocots
4,6,3.6,Rhodospatha_wendlandii,Araceae,Herb,Alismatales,Monocots,Monocots
4,7,4.55,Rhodospatha_wendlandii,Araceae,Herb,Alismatales,Monocots,Monocots
4,8,4.85,Rhodospatha_wendlandii,Araceae,Herb,Alismatales,Monocots,Monocots
4,9,5.5,Rhodospatha_wendlandii,Araceae,Herb,Alismatales,Monocots,Monocots
4,10,5.7,Rhodospatha_wendlandii,Araceae,Herb,Alismatales,Monocots,Monocots
4,11,5.85,Rhodospatha_wendlandii,Araceae,Herb,Alismatales,Monocots,Monocots
4,12,5.9,Rhodospatha_wendlandii,Araceae,Herb,Alismatales,Monocots,Monocots
4,13,5.95,Rhodospatha_wendlandii,Araceae,Herb,Alismatales,Monocots,Monocots
4,26,36.1,Rhodospatha_wendlandii,Araceae,Herb,Alismatales,Monocots,Monocots
4,29,37.6,Rhodospatha_wendlandii,Araceae,Herb,Alismatales,Monocots,Monocots
4,30,37.7,Rhodospatha_wendlandii,Araceae,Herb,Alismatales,Monocots,Monocots
4,31,38.5,Rhodospatha_wendlandii,Araceae,Herb,Alismatales,Monocots,Monocots
4,32,38.6,Rhodospatha_wendlandii,Araceae,Herb,Alismatales,Monocots,Monocots
4,33,40.2,Rhodospatha_wendlandii,Araceae,Herb,Alismatales,Monocots,Monocots
4,35,40.55,Rhodospatha_wendlandii,Araceae,Herb,Alismatales,Monocots,Monocots
4,36,40.65,Rhodospatha_wendlandii,Araceae,Herb,Alismatales,Monocots,Monocots
4,37,41.3,Rhodospatha_wendlandii,Araceae,Herb,Alismatales,Monocots,Monocots
4,38,41.8,Rhodospatha_wendlandii,Araceae,Herb,Alismatales,Monocots,Monocots
4,39,46.2,Rhodospatha_wendlandii,Araceae,Herb,Alismatales,Monocots,Monocots
4,40,46.9,Rhodospatha_wendlandii,Araceae,Herb,Alismatales,Monocots,Monocots
4,41,47,Rhodospatha_wendlandii,Araceae,Herb,Alismatales,Monocots,Monocots
4,42,47.1,Rhodospatha_wendlandii,Araceae,Herb,Alismatales,Monocots,Monocots
3,1,1,Rhodospatha_wendlandii,Araceae,Herb,Alismatales,Monocots,Monocots
3,4,3.55,Rhodospatha_wendlandii,Araceae,Herb,Alismatales,Monocots,Monocots
3,5,3.6,Rhodospatha_wendlandii,Araceae,Herb,Alismatales,Monocots,Monocots
3,7,5.1,Rhodospatha_wendlandii,Araceae,Herb,Alismatales,Monocots,Monocots
3,8,5.2,Rhodospatha_wendlandii,Araceae,Herb,Alismatales,Monocots,Monocots
3,10,5.4,Rhodospatha_wendlandii,Araceae,Herb,Alismatales,Monocots,Monocots
3,11,5.5,Rhodospatha_wendlandii,Araceae,Herb,Alismatales,Monocots,Monocots
3,12,5.5,Rhodospatha_wendlandii,Araceae,Herb,Alismatales,Monocots,Monocots
3,13,6.6,Rhodospatha_wendlandii,Araceae,Herb,Alismatales,Monocots,Monocots
3,14,6.7,Rhodospatha_wendlandii,Araceae,Herb,Alismatales,Monocots,Monocots
3,15,6.75,Rhodospatha_wendlandii,Araceae,Herb,Alismatales,Monocots,Monocots
3,16,6.8,Rhodospatha_wendlandii,Araceae,Herb,Alismatales,Monocots,Monocots
3,17,6.9,Rhodospatha_wendlandii,Araceae,Herb,Alismatales,Monocots,Monocots
3,18,7.1,Rhodospatha_wendlandii,Araceae,Herb,Alismatales,Monocots,Monocots
3,19,7.35,Rhodospatha_wendlandii,Araceae,Herb,Alismatales,Monocots,Monocots
3,20,7.4,Rhodospatha_wendlandii,Araceae,Herb,Alismatales,Monocots,Monocots
3,21,7.45,Rhodospatha_wendlandii,Araceae,Herb,Alismatales,Monocots,Monocots
3,22,7.6,Rhodospatha_wendlandii,Araceae,Herb,Alismatales,Monocots,Monocots
3,23,8.4,Rhodospatha_wendlandii,Araceae,Herb,Alismatales,Monocots,Monocots
3,24,8.45,Rhodospatha_wendlandii,Araceae,Herb,Alismatales,Monocots,Monocots
3,25,8.5,Rhodospatha_wendlandii,Araceae,Herb,Alismatales,Monocots,Monocots
3,26,8.6,Rhodospatha_wendlandii,Araceae,Herb,Alismatales,Monocots,Monocots
3,27,12.35,Rhodospatha_wendlandii,Araceae,Herb,Alismatales,Monocots,Monocots
3,29,13,Rhodospatha_wendlandii,Araceae,Herb,Alismatales,Monocots,Monocots
3,30,13.3,Rhodospatha_wendlandii,Araceae,Herb,Alismatales,Monocots,Monocots
3,35,17.4,Rhodospatha_wendlandii,Araceae,Herb,Alismatales,Monocots,Monocots
3,36,17.5,Rhodospatha_wendlandii,Araceae,Herb,Alismatales,Monocots,Monocots
3,37,17.6,Rhodospatha_wendlandii,Araceae,Herb,Alismatales,Monocots,Monocots
3,38,17.9,Rhodospatha_wendlandii,Araceae,Herb,Alismatales,Monocots,Monocots
3,40,19.2,Rhodospatha_wendlandii,Araceae,Herb,Alismatales,Monocots,Monocots
3,44,21.35,Rhodospatha_wendlandii,Araceae,Herb,Alismatales,Monocots,Monocots
3,45,21.55,Rhodospatha_wendlandii,Araceae,Herb,Alismatales,Monocots,Monocots
3,49,23.05,Rhodospatha_wendlandii,Araceae,Herb,Alismatales,Monocots,Monocots
3,54,24.2,Rhodospatha_wendlandii,Araceae,Herb,Alismatales,Monocots,Monocots
3,55,24.25,Rhodospatha_wendlandii,Araceae,Herb,Alismatales,Monocots,Monocots
3,57,24.73,Rhodospatha_wendlandii,Araceae,Herb,Alismatales,Monocots,Monocots
3,59,27.35,Rhodospatha_wendlandii,Araceae,Herb,Alismatales,Monocots,Monocots
3,60,28.4,Rhodospatha_wendlandii,Araceae,Herb,Alismatales,Monocots,Monocots
3,61,29.05,Rhodospatha_wendlandii,Araceae,Herb,Alismatales,Monocots,Monocots
3,62,29.15,Rhodospatha_wendlandii,Araceae,Herb,Alismatales,Monocots,Monocots
3,64,30.87,Rhodospatha_wendlandii,Araceae,Herb,Alismatales,Monocots,Monocots
3,65,31.05,Rhodospatha_wendlandii,Araceae,Herb,Alismatales,Monocots,Monocots
3,66,31.95,Rhodospatha_wendlandii,Araceae,Herb,Alismatales,Monocots,Monocots
3,67,32.15,Rhodospatha_wendlandii,Araceae,Herb,Alismatales,Monocots,Monocots
3,68,32.33,Rhodospatha_wendlandii,Araceae,Herb,Alismatales,Monocots,Monocots
3,69,32.55,Rhodospatha_wendlandii,Araceae,Herb,Alismatales,Monocots,Monocots
3,70,32.65,Rhodospatha_wendlandii,Araceae,Herb,Alismatales,Monocots,Monocots
3,71,32.85,Rhodospatha_wendlandii,Araceae,Herb,Alismatales,Monocots,Monocots
3,72,32.9,Rhodospatha_wendlandii,Araceae,Herb,Alismatales,Monocots,Monocots
3,73,33.45,Rhodospatha_wendlandii,Araceae,Herb,Alismatales,Monocots,Monocots
3,75,33.6,Rhodospatha_wendlandii,Araceae,Herb,Alismatales,Monocots,Monocots
3,76,33.9,Rhodospatha_wendlandii,Araceae,Herb,Alismatales,Monocots,Monocots
3,77,34.1,Rhodospatha_wendlandii,Araceae,Herb,Alismatales,Monocots,Monocots
3,78,34.3,Rhodospatha_wendlandii,Araceae,Herb,Alismatales,Monocots,Monocots
3,79,34.6,Rhodospatha_wendlandii,Araceae,Herb,Alismatales,Monocots,Monocots
3,80,34.8,Rhodospatha_wendlandii,Araceae,Herb,Alismatales,Monocots,Monocots
3,81,35.25,Rhodospatha_wendlandii,Araceae,Herb,Alismatales,Monocots,Monocots
3,82,35.4,Rhodospatha_wendlandii,Araceae,Herb,Alismatales,Monocots,Monocots
3,83,36.65,Rhodospatha_wendlandii,Araceae,Herb,Alismatales,Monocots,Monocots
3,84,36.05,Rhodospatha_wendlandii,Araceae,Herb,Alismatales,Monocots,Monocots
3,85,36.2,Rhodospatha_wendlandii,Araceae,Herb,Alismatales,Monocots,Monocots
3,86,36.75,Rhodospatha_wendlandii,Araceae,Herb,Alismatales,Monocots,Monocots
3,87,37.2,Rhodospatha_wendlandii,Araceae,Herb,Alismatales,Monocots,Monocots
3,88,37.6,Rhodospatha_wendlandii,Araceae,Herb,Alismatales,Monocots,Monocots
3,89,37.9,Rhodospatha_wendlandii,Araceae,Herb,Alismatales,Monocots,Monocots
3,90,38.25,Rhodospatha_wendlandii,Araceae,Herb,Alismatales,Monocots,Monocots
3,91,38.6,Rhodospatha_wendlandii,Araceae,Herb,Alismatales,Monocots,Monocots
3,92,39.35,Rhodospatha_wendlandii,Araceae,Herb,Alismatales,Monocots,Monocots
3,101,44,Rhodospatha_wendlandii,Araceae,Herb,Alismatales,Monocots,Monocots
3,108,49.75,Rhodospatha_wendlandii,Araceae,Herb,Alismatales,Monocots,Monocots
2,3,1.6,Rhodospatha_wendlandii,Araceae,Herb,Alismatales,Monocots,Monocots
2,4,2.3,Rhodospatha_wendlandii,Araceae,Herb,Alismatales,Monocots,Monocots
2,9,4.4,Rhodospatha_wendlandii,Araceae,Herb,Alismatales,Monocots,Monocots
2,21,25.3,Rhodospatha_wendlandii,Araceae,Herb,Alismatales,Monocots,Monocots
2,22,26.15,Rhodospatha_wendlandii,Araceae,Herb,Alismatales,Monocots,Monocots
1,56,37.33,Rhodospatha_wendlandii,Araceae,Herb,Alismatales,Monocots,Monocots
4,44,49.45,Schaueria_parviflora,Acanthaceae,Herb,Lamiales,Asterids,Eudicots
1,35,26.6,Schaueria_parviflora,Acanthaceae,Herb,Lamiales,Asterids,Eudicots
1,43,31.6,Schaueria_parviflora,Acanthaceae,Herb,Lamiales,Asterids,Eudicots
10,18,17.67,Spathiphyllum_cochlearispathum,Araceae,Herb,Alismatales,Monocots,Monocots
10,24,25.05,Spathiphyllum_cochlearispathum,Araceae,Herb,Alismatales,Monocots,Monocots
10,30,29.3,Spathiphyllum_cochlearispathum,Araceae,Herb,Alismatales,Monocots,Monocots
10,36,37.35,Spathiphyllum_cochlearispathum,Araceae,Herb,Alismatales,Monocots,Monocots
10,37,38.8,Spathiphyllum_cochlearispathum,Araceae,Herb,Alismatales,Monocots,Monocots
10,40,41.35,Spathiphyllum_cochlearispathum,Araceae,Herb,Alismatales,Monocots,Monocots
9,36,48.85,Spathiphyllum_cochlearispathum,Araceae,Herb,Alismatales,Monocots,Monocots
5,1,1.2,Spathiphyllum_cochlearispathum,Araceae,Herb,Alismatales,Monocots,Monocots
5,5,4.25,Spathiphyllum_cochlearispathum,Araceae,Herb,Alismatales,Monocots,Monocots
5,49,39.95,Spathiphyllum_cochlearispathum,Araceae,Herb,Alismatales,Monocots,Monocots
8,6,18.6,Spathiphyllum_cochlearispathum,Araceae,Herb,Alismatales,Monocots,Monocots
8,9,24.05,Spathiphyllum_cochlearispathum,Araceae,Herb,Alismatales,Monocots,Monocots
3,6,4.2,Spathiphyllum_cochlearispathum,Araceae,Herb,Alismatales,Monocots,Monocots
3,48,22.5,Spathiphyllum_cochlearispathum,Araceae,Herb,Alismatales,Monocots,Monocots
3,56,24.37,Spathiphyllum_cochlearispathum,Araceae,Herb,Alismatales,Monocots,Monocots
3,93,40.05,Spathiphyllum_cochlearispathum,Araceae,Herb,Alismatales,Monocots,Monocots
3,94,40.5,Spathiphyllum_cochlearispathum,Araceae,Herb,Alismatales,Monocots,Monocots
3,95,41.1,Spathiphyllum_cochlearispathum,Araceae,Herb,Alismatales,Monocots,Monocots
3,98,42.8,Spathiphyllum_cochlearispathum,Araceae,Herb,Alismatales,Monocots,Monocots
3,99,43,Spathiphyllum_cochlearispathum,Araceae,Herb,Alismatales,Monocots,Monocots
3,100,43.5,Spathiphyllum_cochlearispathum,Araceae,Herb,Alismatales,Monocots,Monocots
2,19,17.5,Spathiphyllum_cochlearispathum,Araceae,Herb,Alismatales,Monocots,Monocots
1,31,22.8,Spathiphyllum_cochlearispathum,Araceae,Herb,Alismatales,Monocots,Monocots
1,41,30.5,Spathiphyllum_cochlearispathum,Araceae,Herb,Alismatales,Monocots,Monocots
6,53,29,Syngonium_chiapensis,Araceae,Herb,Alismatales,Monocots,Monocots
5,19,18.1,Syngonium_chiapensis,Araceae,Herb,Alismatales,Monocots,Monocots
5,23,22.7,Syngonium_chiapensis,Araceae,Herb,Alismatales,Monocots,Monocots
5,24,24.1,Syngonium_chiapensis,Araceae,Herb,Alismatales,Monocots,Monocots
5,25,24.7,Syngonium_chiapensis,Araceae,Herb,Alismatales,Monocots,Monocots
5,27,24.8,Syngonium_chiapensis,Araceae,Herb,Alismatales,Monocots,Monocots
5,47,35.5,Syngonium_chiapensis,Araceae,Herb,Alismatales,Monocots,Monocots
5,48,37.65,Syngonium_chiapensis,Araceae,Herb,Alismatales,Monocots,Monocots
8,1,1.91,Syngonium_chiapensis,Araceae,Herb,Alismatales,Monocots,Monocots
8,3,16.83,Syngonium_chiapensis,Araceae,Herb,Alismatales,Monocots,Monocots
8,13,31.6,Syngonium_chiapensis,Araceae,Herb,Alismatales,Monocots,Monocots
8,26,49.35,Syngonium_chiapensis,Araceae,Herb,Alismatales,Monocots,Monocots
7,16,17.7,Syngonium_chiapensis,Araceae,Herb,Alismatales,Monocots,Monocots
7,17,19.25,Syngonium_chiapensis,Araceae,Herb,Alismatales,Monocots,Monocots
7,22,21.3,Syngonium_chiapensis,Araceae,Herb,Alismatales,Monocots,Monocots
7,27,34.55,Syngonium_chiapensis,Araceae,Herb,Alismatales,Monocots,Monocots
7,34,40.3,Syngonium_chiapensis,Araceae,Herb,Alismatales,Monocots,Monocots
7,51,48.6,Syngonium_chiapensis,Araceae,Herb,Alismatales,Monocots,Monocots
4,14,12.7,Syngonium_chiapensis,Araceae,Herb,Alismatales,Monocots,Monocots
3,104,49.2,Syngonium_chiapensis,Araceae,Herb,Alismatales,Monocots,Monocots
2,27,35.87,Syngonium_chiapensis,Araceae,Herb,Alismatales,Monocots,Monocots
1,6,1.6,Syngonium_chiapensis,Araceae,Herb,Alismatales,Monocots,Monocots
1,23,12.8,Syngonium_chiapensis,Araceae,Herb,Alismatales,Monocots,Monocots
1,25,18.5,Syngonium_chiapensis,Araceae,Herb,Alismatales,Monocots,Monocots
1,29,20.8,Syngonium_chiapensis,Araceae,Herb,Alismatales,Monocots,Monocots
1,51,34.57,Syngonium_chiapensis,Araceae,Herb,Alismatales,Monocots,Monocots
1,55,36.45,Syngonium_chiapensis,Araceae,Herb,Alismatales,Monocots,Monocots
1,57,40.05,Syngonium_chiapensis,Araceae,Herb,Alismatales,Monocots,Monocots
10,35,32.51,Syngonium_podophyllum,Araceae,Herb,Alismatales,Monocots,Monocots
10,38,39.12,Syngonium_podophyllum,Araceae,Herb,Alismatales,Monocots,Monocots
10,39,40.65,Syngonium_podophyllum,Araceae,Herb,Alismatales,Monocots,Monocots
10,45,44.44,Syngonium_podophyllum,Araceae,Herb,Alismatales,Monocots,Monocots
10,46,44.87,Syngonium_podophyllum,Araceae,Herb,Alismatales,Monocots,Monocots
10,49,46.71,Syngonium_podophyllum,Araceae,Herb,Alismatales,Monocots,Monocots
9,2,2.52,Syngonium_podophyllum,Araceae,Herb,Alismatales,Monocots,Monocots
9,8,7.94,Syngonium_podophyllum,Araceae,Herb,Alismatales,Monocots,Monocots
9,16,19.2,Syngonium_podophyllum,Araceae,Herb,Alismatales,Monocots,Monocots
6,2,0.5,Syngonium_podophyllum,Araceae,Herb,Alismatales,Monocots,Monocots
6,13,3.4,Syngonium_podophyllum,Araceae,Herb,Alismatales,Monocots,Monocots
6,27,11.3,Syngonium_podophyllum,Araceae,Herb,Alismatales,Monocots,Monocots
6,28,11.6,Syngonium_podophyllum,Araceae,Herb,Alismatales,Monocots,Monocots
6,30,13.3,Syngonium_podophyllum,Araceae,Herb,Alismatales,Monocots,Monocots
6,42,24.6,Syngonium_podophyllum,Araceae,Herb,Alismatales,Monocots,Monocots
6,43,25.1,Syngonium_podophyllum,Araceae,Herb,Alismatales,Monocots,Monocots
6,44,25.5,Syngonium_podophyllum,Araceae,Herb,Alismatales,Monocots,Monocots
6,45,26.2,Syngonium_podophyllum,Araceae,Herb,Alismatales,Monocots,Monocots
6,46,26.4,Syngonium_podophyllum,Araceae,Herb,Alismatales,Monocots,Monocots
6,47,26.6,Syngonium_podophyllum,Araceae,Herb,Alismatales,Monocots,Monocots
6,51,27.3,Syngonium_podophyllum,Araceae,Herb,Alismatales,Monocots,Monocots
6,63,32.7,Syngonium_podophyllum,Araceae,Herb,Alismatales,Monocots,Monocots
6,64,32.9,Syngonium_podophyllum,Araceae,Herb,Alismatales,Monocots,Monocots
6,69,35.1,Syngonium_podophyllum,Araceae,Herb,Alismatales,Monocots,Monocots
6,74,39.2,Syngonium_podophyllum,Araceae,Herb,Alismatales,Monocots,Monocots
6,76,40.9,Syngonium_podophyllum,Araceae,Herb,Alismatales,Monocots,Monocots
6,77,41,Syngonium_podophyllum,Araceae,Herb,Alismatales,Monocots,Monocots
6,78,41.25,Syngonium_podophyllum,Araceae,Herb,Alismatales,Monocots,Monocots
6,79,41.5,Syngonium_podophyllum,Araceae,Herb,Alismatales,Monocots,Monocots
6,80,41.07,Syngonium_podophyllum,Araceae,Herb,Alismatales,Monocots,Monocots
6,81,41.9,Syngonium_podophyllum,Araceae,Herb,Alismatales,Monocots,Monocots
6,84,46.06,Syngonium_podophyllum,Araceae,Herb,Alismatales,Monocots,Monocots
5,16,13.45,Syngonium_podophyllum,Araceae,Herb,Alismatales,Monocots,Monocots
5,17,14.2,Syngonium_podophyllum,Araceae,Herb,Alismatales,Monocots,Monocots
5,43,31.9,Syngonium_podophyllum,Araceae,Herb,Alismatales,Monocots,Monocots
5,54,47.9,Syngonium_podophyllum,Araceae,Herb,Alismatales,Monocots,Monocots
8,17,38.55,Syngonium_podophyllum,Araceae,Herb,Alismatales,Monocots,Monocots
7,25,33.3,Syngonium_podophyllum,Araceae,Herb,Alismatales,Monocots,Monocots
7,33,39.4,Syngonium_podophyllum,Araceae,Herb,Alismatales,Monocots,Monocots
7,43,41.25,Syngonium_podophyllum,Araceae,Herb,Alismatales,Monocots,Monocots
4,22,23.75,Syngonium_podophyllum,Araceae,Herb,Alismatales,Monocots,Monocots
3,105,49.45,Syngonium_podophyllum,Araceae,Herb,Alismatales,Monocots,Monocots
3,106,49.57,Syngonium_podophyllum,Araceae,Herb,Alismatales,Monocots,Monocots
2,17,15.55,Syngonium_podophyllum,Araceae,Herb,Alismatales,Monocots,Monocots
1,37,27.7,Syngonium_podophyllum,Araceae,Herb,Alismatales,Monocots,Monocots
1,40,29.5,Syngonium_podophyllum,Araceae,Herb,Alismatales,Monocots,Monocots
1,59,41.4,Syngonium_podophyllum,Araceae,Herb,Alismatales,Monocots,Monocots
1,60,41.6,Syngonium_podophyllum,Araceae,Herb,Alismatales,Monocots,Monocots
1,68,47.8,Syngonium_podophyllum,Araceae,Herb,Alismatales,Monocots,Monocots
10,21,22.38,Thelypteris_rachyflexuosa,Thelypteridaceae,Fern,Polypodiales,Polypodiopsida,Pteridophyta
10,31,29.9,Thelypteris_rachyflexuosa,Thelypteridaceae,Fern,Polypodiales,Polypodiopsida,Pteridophyta
9,14,18.44,Thelypteris_rachyflexuosa,Thelypteridaceae,Fern,Polypodiales,Polypodiopsida,Pteridophyta
9,24,32.41,Thelypteris_rachyflexuosa,Thelypteridaceae,Fern,Polypodiales,Polypodiopsida,Pteridophyta
8,20,39.65,Thelypteris_rachyflexuosa,Thelypteridaceae,Fern,Polypodiales,Polypodiopsida,Pteridophyta
3,47,21.93,Thelypteris_rachyflexuosa,Thelypteridaceae,Fern,Polypodiales,Polypodiopsida,Pteridophyta
3,58,25.3,Thelypteris_rachyflexuosa,Thelypteridaceae,Fern,Polypodiales,Polypodiopsida,Pteridophyta
2,26,35.9,Thelypteris_rachyflexuosa,Thelypteridaceae,Fern,Polypodiales,Polypodiopsida,Pteridophyta
1,36,27.1,Thelypteris_rachyflexuosa,Thelypteridaceae,Fern,Polypodiales,Polypodiopsida,Pteridophyta
